## 1 ***In situ* and high-resolution Cryo-EM structure of the Type VI secretion membrane complex**

2

3 Chiara Rapisarda<sup>1,2\*</sup>, Yassine Cherrak<sup>3\*</sup>, Romain Kooger<sup>4\*</sup>, Victoria Schmidt<sup>3</sup>, Riccardo Pellarin<sup>5</sup>,

4 Laureen Logger<sup>3</sup>, Eric Cascales<sup>6</sup>, Martin Pilhofer<sup>4#</sup>, Eric Durand<sup>3#</sup>, Rémi Fronzes<sup>1,2#</sup>

5

6 <sup>1</sup>CNRS UMR 5234 Microbiologie Fondamentale et Pathogénicité, Paris, France.

7 <sup>2</sup>Institut Européen de Chimie et Biologie, University of Bordeaux, 2 rue Robert Escarpit, 33607,  
8 Pessac, France.

9 <sup>3</sup>Laboratoire d'Ingénierie des Systèmes Macromoléculaires (LISM), Institut de Microbiologie de la  
10 Méditerranée (IMM), UMR7255, Aix-Marseille Université - CNRS, Marseille, France.

11 <sup>4</sup>Institute of Molecular Biology & Biophysics, Eidgenössische Technische Hochschule Zürich, CH-8093  
12 Zürich, Switzerland

13 <sup>5</sup>Institut Pasteur, Structural Bioinformatics Unit, Department of Structural Biology and Chemistry,  
14 CNRS UMR 3528, C3BI USR 3756, Paris, France.

15 <sup>6</sup>Laboratoire d'Ingénierie des Systèmes Macromoléculaires (LISM), Institut de Microbiologie de la  
16 Méditerranée (IMM), UMR7255, INSERM - Marseille, France.

17

18 \*these authors contributed equally to the work

19 # corresponding authors: pilhofer@biol.ethz.ch, edurand@imm.cnrs.fr & edurand@inserm.fr and

20 r.fronzes@iecb.u-bordeaux.fr

21

22

## 23 **Abstract**

24

25 Bacteria have evolved macromolecular machineries that secrete effectors and toxins to survive and  
26 thrive in diverse environments. The type VI secretion system (T6SS) is a contractile machine that is  
27 related to *Myoviridae* phages. The T6SS is composed of a baseplate that contains a spike onto which  
28 an inner tube is built, surrounded by a contractile sheath. Unlike phages that are released to and act  
29 in the extracellular medium, the T6SS is an intracellular machine inserted in the bacterial membranes  
30 by a trans-envelope complex. This membrane complex (MC) comprises three proteins: TssJ, TssL and  
31 TssM. We previously reported the low-resolution negative stain electron microscopy structure of the  
32 enteroaggregative *Escherichia coli* MC and proposed a rotational 5-fold symmetry with a  
33 TssJ:TssL:TssM stoichiometry of 2:2:2. Here, cryo-electron tomography analysis of the T6SS MC  
34 confirmed the 5-fold symmetry *in situ* and identified the regions of the structure that insert into the  
35 bacterial membranes. A high resolution model obtained by single particle cryo-electron microscopy  
36 reveals its global architecture and highlights new features: five additional copies of TssJ, yielding a  
37 TssJ:TssL:TssM stoichiometry of 3:2:2, a 11-residue loop in TssM, protruding inside the lumen of the

38 MC and constituting a functionally important periplasmic gate, and hinge regions. Based on these  
39 data, we revisit the model on the mechanism of action of the MC during T6SS assembly and function.

40  
41

## 42 **Introduction:**

43 In a competitive environment, the ability to communicate and outcompete neighbours  
44 provides bacteria with key advantages to survive. The type VI secretion system (T6SS) is a  
45 macromolecular complex involved in the release of toxins that disrupt essential functions in  
46 competitor cells (Russell *et al*, 2014). The T6SS is associated with increased survival and  
47 pathogenicity in bacteria expressing it (Zhao *et al*, 2018). The T6SS is composed of 13-14 core  
48 proteins (Boyer *et al*, 2009), usually encoded in the same locus in the genome (Mougous *et al*, 2006).  
49 The T6SS assembles a molecular spring-loaded dagger, which punctures the target cell to secrete  
50 fully folded effector proteins into neighbouring bacteria (Russell *et al*, 2011) or eukaryotic hosts  
51 (Barker *et al*, 2009). The full assembly consists of the trans-envelope TssJLM membrane complex  
52 (MC) (Durand *et al*, 2015) that tethers the TssKFGE-VgrG baseplate (Brunet *et al*, 2015)(No Title),  
53 onto which the tail polymerize. This tail comprises the inner tube made of stacks of Hcp hexamers  
54 wrapped by the TssBC sheath proteins that polymerize in a helical conformation (Brunet *et al*, 2014;  
55 Clemens *et al*, 2015; Kudryashev *et al*, 2015; Chang *et al*, 2017) and tipped by the spike VgrG which  
56 can be sharpened by the PAAR protein (Renault *et al*, 2018; Shneider *et al*, 2013). Effectors are either  
57 associated within the Hcp lumen, or directly or indirectly bound to the VgrG or PAAR spike  
58 (Unterweger *et al*, 2017; Silverman *et al*, 2013; Shneider *et al*, 2013; Flaugnatti *et al*, 2016a; Quentin  
59 *et al*, 2018). Upon contact with a neighbouring cell, unknown signals trigger the contraction of the  
60 sheath causing the tube and spike to pierce the membranes and secrete the effectors (Basler *et al*,  
61 2012).

62 While the baseplate, tube and sheath proteins are conserved among contractile injection  
63 systems, the MC is specific to the T6SS. TssJ is an outer membrane lipoprotein (Aschtgen *et al*,  
64 2008a) that positions first at the site of assembly, and then recruits TssM and TssL (Durand *et al*,  
65 2015). TssM and TssL are two inner membrane proteins that share homology with two accessory  
66 subunits associated with T4SSb, IcmF and IcmH/DotU (Aschtgen *et al*, 2012; Ma *et al*, 2009; Durand  
67 *et al*, 2012; Logger *et al*, 2016). Not only does the MC anchor the baseplate to the inner membrane,  
68 but it would also serves as a channel to allow the passage of the tail tube/spike and maintain the  
69 integrity of the attacking cell during the translocation of the inner tube (Durand *et al*, 2015). The  
70 different subunits and the MC have been extensively biochemically characterised and several crystal  
71 structures of the components are available from various bacterial species (Felisberto-Rodrigues *et al*,

72 2011; Durand *et al*, 2012; Rao *et al*, 2011; Robb *et al*, 2012; Chang & Kim, 2015; Durand *et al*, 2015).  
73 We previously reported the negative-stain electron microscopy (EM) structure of the TssJLM complex  
74 from enteroaggregative *Escherichia coli* (EAEC). We determined that 10 TssJ lipoproteins are bound  
75 to 10 TssM proteins, forming two concentric rings of pillars and arches that span the periplasm. The  
76 arches were shown to link to a flexible base composed of the N-terminal part of TssM and 10 copies  
77 of TssL (Durand *et al*, 2015). This study also revealed that the EAEC TssJLM complex assembles into a  
78 5-fold rotationally symmetric trans-envelope structure. However, the symmetry mismatch between  
79 the 5-fold symmetry of the MC and 6-fold symmetry of the baseplate (Nazarov *et al*, 2018) questions  
80 whether the purified TssJLM MC reflects the *in vivo* situation. In addition, although most of the  
81 available crystal structures can be fitted into this EM structure, we currently lack molecular details on  
82 the whole complex, such as the precise location of the membranes, of the trans-membrane helices,  
83 and the potential presence of a periplasmic channel.

84 Here, we first present the *in situ* cryo-electron tomography (cryo-ET) structure of the EAEC  
85 TssJLM MC. These data confirm the 5-fold symmetry of the complex *in vivo*, and provide information  
86 on the location of the inner and outer membranes. We then present the single particle (SPA) cryo-  
87 electron microscopy (cryo-EM) structure of the MC that describes the intricate molecular  
88 architecture of the periplasmic portion of the complex. This high-resolution cryo-EM structure  
89 reveals the presence of five additional copies of TssJ at the tip of the complex, the presence of a  
90 periplasmic gate that closes a periplasmic channel. Finally, we demonstrate that the periplasmic gate  
91 and the additional TssJ are required for T6SS-dependent activity *in vivo*.

## 92 **Results**

### 93 *Structure of the T6SS MC within the cell envelope*

94 To observe the T6SS MC in its native cellular environment, we performed cryo-ET on bacterial  
95 cells (Weiss *et al*, 2017). With the aim to have a sufficient number of particles to obtain an *in situ*  
96 structure by subtomogram averaging, we imaged *E. coli* BL21(DE3) cells in which TssJLM were  
97 heterologously overexpressed. This strain does not possess T6SS genes, thereby preventing any  
98 crosstalk or protein-protein interactions between TssJLM and other natively present T6SS proteins.  
99 Since *E. coli* is too thick to be directly imaged by cryo-ET, we pursued three different approaches to  
100 tackle sample thickness. The first approach consisted of engineering a minicell-producing skinny  
101 strain (Farley *et al*, 2016) of *E. coli* BL21(DE3), and thereby generating a minicell strain that is  
102 compatible with the T7-based expression system. Although this strain produced minicells as small as  
103 450 nm in diameter (Fig EV1A), their size still affected the contrast to an extent that did not allow for  
104 sub-tomogram averaging. Nevertheless, characteristic inverted Y-shaped particles (side views, Fig

105 EV1B) and star-shaped particles (top views, Fig EV1C) could occasionally be observed in the  
106 periplasm of these minicells. In a second approach, tomograms were recorded of cells that were  
107 partially lysed and exhibited a high contrast (Fig EV1D, E). These cells, which have previously been  
108 described as “ghost cells” due to their transparent appearance, still had mostly intact membranes  
109 and conserved their cytoplasmic macromolecular complexes such as ribosomes (Fu *et al*, 2014). In a  
110 third approach, we used a state-of-the-art cryo-sample thinning method called focused ion beam  
111 (FIB) milling to thin *E. coli* BL21(DE3) cells in which TssJLM were heterologously overexpressed (Fig  
112 EV1F, G). FIB milling allows to etch through a lawn of bacterial cells and thin them down to under 200  
113 nm (Medeiros *et al*, 2018a, 2018b; Marko *et al*, 2007). This approach was more native, as it was  
114 performed on intact rod-shaped wild-type BL21(DE3) cells. These tomograms had a high contrast and  
115 provided great detail. To confirm the relevance of these observations, we carried out control  
116 experiments in the native T6SS<sup>+</sup> EAEC 17-2 strain. TssJLM particles were also readily observed by  
117 cryo-ET, both when heterologously overproduced (Fig EV1H, note that the particles could  
118 occasionally be found detached from the outer membrane: Fig EV1J) as well as under native  
119 conditions, *i.e.* in wild-type EAEC 17-2 cells (Fig EV1).

120 Sub-volumes of star-shaped (top views) and inverted Y-shaped (side views) particles were  
121 manually picked and subsequently aligned and averaged. The resulting average was similar to the *in*  
122 *vitro* T6SS MC structure published previously (Durand *et al*, 2015), with a tip and a core, made of 5  
123 pairs of pillars forming a narrow central channel, that splits into 10 arches (Fig 1A-E). Importantly, the  
124 5-fold symmetry was evident without applying symmetry (Fig 1A'). As it is the case for the TssJLM MC  
125 solved by EM (Durand *et al*, 2015), the periplasmic core and the arches were well resolved, whereas  
126 the inner membrane embedded base and the outer membrane-embedded cap were poorly resolved.  
127 The Fourier shell correlation (FSC) curve indicated a resolution of 25 Å at a coefficient of 0.5 (Fig EV2  
128 A). The prevalence of top views indicated that the average might be affected by a missing wedge (Fig  
129 EV2 B).

130 After aligning and averaging a set of sub-volumes, it can be useful to place the isosurface of  
131 the average back in the original tomographic volume to analyze the positions and orientations of the  
132 individual aligned particles. In this way, we obtained a clear view of the location of the MC within the  
133 cell envelope (Fig 2A, Movie 1 and Fig EV2 C-E, Movie 2). The position of the membranes with respect  
134 to the TssJLM highlighted that the tip was embedded in the outer membrane without crossing it,  
135 while the MC was anchored in the inner membrane at the lower part of the arches (Fig 2B). In some  
136 cases, densities could be seen spanning the inner membrane and extending into the cytoplasm (Fig  
137 2C). In what could be an overexpression artefact, TssJLM particles were also found in cytoplasmic  
138 membrane invaginations (Fig 2A). Altogether, these data confirmed the 5-fold symmetry of the T6SS  
139 TssJLM MC *in situ* and provided further insights into the position of the inner and outer membranes.

140

### 141 *Structural analysis of the TssJLM complex by cryo-EM*

142 We previously reported the negative stain EM structure of the EAEC TssJLM MC (Durand *et al*,  
143 2015). Here, we used the same purification procedure and used SPA cryo-EM to obtain the cryo-EM  
144 structure of the 1.7 MDa T6SS MC at 4.9 Å overall resolution. With a 5-fold symmetry imposed, the  
145 local resolution ranged between 4.1 Å and 21.7 Å (Figs 3A and EV3A-E). The angular distribution of  
146 the particles was good and allowed us to reach a high resolution (Fig EV3 C, F).

147 The 5-fold symmetry is clearly visible in the 2D classes top views and the volume slices of the  
148 reconstruction, which retain a 5-pointed star shape (Fig EV3C,G). When no symmetry was applied  
149 during the reconstruction, the overall resolution decreased to 7.5 Å but the pentameric nature of the  
150 complex was maintained, with only one of the 10 arches displaying weaker density than the others  
151 causing the drop in resolution (Fig EV3H, I). This could indicate partial assembly of the complex *in*  
152 *vivo* or disassembly during its purification.

153 The overall structure resembles that obtained by negative stain (Fig EV3J(Durand *et al*, 2015)).  
154 The architecture of the complex comprises a tip connected to a core region that extends to a base,  
155 through a double ring of pillars with arches in proximity to the inner membrane (Fig 3A-B). Several  
156 notable features are already evident from the cryo-EM density map of the full complex (Fig 3A). First,  
157 the tip region and the base are disordered, and appear to be filled by random densities. Second,  
158 cross-sections of the full complex show that the channel, across which tube/spike transport might  
159 occur, is closed by a gate at the intersection between arches and pillars, above the inner membrane  
160 (Fig 3B-E).

161 To better characterise the flexibility of the base of the complex, we collected tomograms on  
162 the same frozen EM grids that were used to collect the SPA dataset (Fig EV4A-C). The base of  
163 individual complexes appeared as very heterogeneous, with single arches often pointing in opposite  
164 directions, or on the contrary several arches clumping together (Fig EV4A). On the other hand, the  
165 core was rigid and resembled a 5-branched star. Moreover, about 20% of the particles possessed  
166 only 3 or 4 out of 5 branches (Fig EV4B), indicating that partial assemblies could be stable. The  
167 particles were lying in a thin layer of ice (25 nm) and were found at different orientations (Fig EV4C1-  
168 2).

169

### 170 *The structure of the base*

171 To try and overcome the inherent flexibility of the complex and better discern different  
172 features of the base, we performed a density subtraction of the tip, core and arches followed by a

173 focused refinement of the base with and without symmetry applied. We thus obtained 2D classes  
174 and a 3D structure of the base at 17-Å resolution when a C5 symmetry was applied (Figs 3F and  
175 EV4E-F). When observing the cross section of the base in the full complex, as indicated by arrows in  
176 Fig3B, and in the subtracted structure (Fig EV4E), two 110 Å-wide linear densities are clearly visible,  
177 separated by 40 Å. This double layer of density is consistent with the density diagram of a lipid  
178 bilayer with the head groups being the most dense at a distance of ~4 nm from each other and fits  
179 well a lipid bilayer composed of PE, obtained using the CHARMM-GUI (Jo *et al*, 2007) (Fig EV4E). We  
180 conclude that the inner membrane sub-domain of the T6SS MC is filled by a lipid bilayer.

181

### 182 *An additional TssJ is present in the full complex*

183 To focus on the best-resolved region of the cryo-EM map, the base was subtracted from the  
184 tip, a 2D classification and a masked 3D refinement was performed to obtain the structure of the  
185 core at 4.5 Å (Figs 3G and EV5A-B), with a local resolution ranging from 4 Å to >10 Å (Fig EV 5C). The  
186 known crystallographic structure of the C-terminus of TssM (aa. 869-1129) bound to TssJ (PDB 4Y7O)  
187 could be easily fitted in the outer and inner pillars, with a correlation of 0.8505 and 0.565  
188 respectively, leaving an extra density (Fig EV5D-E). Interestingly, an extra TssJ subunit, TssJ', which  
189 was not observed in the low resolution complex (Durand *et al*, 2015) fits in this extra density with a  
190 correlation of 0.879 (EV5E-F). We conclude that the T6SS MC comprises 15 TssJ proteins, 3 TssJs for 2  
191 TssM (Fig 4A). No additional residues were visible for the N- and C-termini of TssJ (1-21 and 151-155),  
192 disordered in both the crystal and the cryo-EM structures. After placing the extra TssJ, we refined the  
193 TssM-TssJ crystal structure and the newly fitted TssJ copy against the cryo-EM map to obtain the  
194 structure of each TssM and TssJ monomer within the whole MC.

195 TssJ' binds to the MC through previously unknown interfaces. If we consider the TssJ.i, TssJ.o  
196 and the TssJ' subunits (Figs 4A-C and EV6A-B) with TssJ.i and TssJ.o being in contact with TssM.i and  
197 TssM.o respectively, they sit in the same position as in the crystal structure and in the outer and  
198 inner pillars (Fig 4B). By contrast, TssJ' binds to TssM.o and TssJ.i strongly (Fig 4C, Table EV1). In  
199 particular, the interaction of TssJ' with TssJ.i is specifically strong, as their contact is mediated not  
200 only by hydrogen bonds but also by salt bridges (R31 with E34, and D97 with R33; see Fig EV6C). TssJ'  
201 binds to TssM.i via hydrogen bonds only and this interaction is comparable to that between TssJ.i and  
202 TssJ.o with TssM.i and TssM.o respectively (surface of interaction 573 Å<sup>2</sup> and -2.6 kcal/mol ΔG) (Fig  
203 4B-C, Table EV1).

## 204 *TssJ' is required for MC assembly and T6SS activity*

205 To gain further information on the function and *in vivo* relevance of TssJ', mutations that  
206 specifically impact the TssJ'-TssJ.i interface were engineered onto the chromosome, at the native  
207 locus. Two residues, Arg-31 and Asp-97 (Fig EV6C), were targeted as they form a salt bridge with E34  
208 and R33 in TssJ.a, respectively (Table EV 1 and Fig EV6C). The R31E, D97A and D97K substitutions  
209 were then tested for their ability to outcompete a fluorescent *E. coli* competitor strain. Although the  
210 R31E and D97A did not significantly impact T6SS antibacterial activity, the D97K mutation abolished  
211 proper function of the T6SS (Fig 4D). The assembly and stability of the T6SS MC was then assessed by  
212 fluorescence microscopy using a chromosomally-encoded and functional fusion protein between  
213 TssM and the super-folder GFP ( $_{sfGFP}$ TssM, Durand *et al*, 2015) (Fig 4E). As previously observed  
214 (Durand *et al*, 2015), the  $_{sfGFP}$ TssM strain forms stable foci. By contrast, cells producing the TssJ D97K  
215 variant form small and unstable fluorescent  $_{sfGFP}$ TssM foci (Fig. 4E). Time-lapse fluorescence  
216 microscopy recordings showed that about 90% of the foci observed in the  $_{sfGFP}$ TssM strain (n = 50) are  
217 stable over the 600-sec recording time, in agreement with the previous observation that the EAEC  
218 T6SS MC is stable and serves for several contraction/elongation cycles (Durand *et al.*, 2015). By  
219 contrast, with a mean lifetime of ~ 107 sec (n = 50) the  $_{sfGFP}$ TssM fluorescent foci observed in cells  
220 producing the TssJ D97K variant are drastically less stable (Fig EV 7A). We then tested whether the  
221 TssJ D97K variant promotes sheath assembly, using chromosomally-encoded functional  $_{sfGFP}$ TssB  
222 fusion. Fig. 4F shows that, contrarily to the wild-type parental cells in which dynamic sheaths can be  
223 observed, no sheath polymerization occurs in presence of TssJ-D97K (Fig. 4F and EV Fig.7B).  
224 Altogether, these results demonstrate that TssJ'-TssJ.i interface is required for the stability of the  
225 T6SS MC, sheath formation and T6SS antibacterial activity.

226

## 227 *A flexible hinge within the TssM periplasmic domain*

228 We were able to confidently build *de novo* the periplasmic domain of TssM including its N-  
229 terminal fragment (residues 579 to 869) that was missing in the crystal structure (Durand *et al*,  
230 2015). This was done in Coot (Emsley *et al*, 2010) by using Phyre2 secondary structure predictions  
231 (Kelley *et al*, 2015) and RaptorX evolutionary covariance interaction predictions (Källberg *et al*, 2012)  
232 as validation tools (Fig 5A and EV8A-C). The cryo-EM structure of the TssM periplasmic domain  
233 slightly differs from the X-ray structure (Fig EV9A). From the C-terminus, helix 869-891 extends to  
234 amino-acid 841 with a slight kink at residue Pro-870. The remaining N-terminal fragment forms an  $\alpha$ -  
235 helical domain comprising 8 helices that snake back and forth to the inner membrane (Fig 5A). The  
236 region closest to the membrane was too flexible to be resolved and for an atomic model to be built  
237 (Fig EV8B). The cryo-EM pseudoatomic model of the fully assembled TssM-TssJ complex shows it

238 forms a bell shape composed of two rings of pillars that twist around each other (Fig 5A). Within each  
239 asymmetric unit, two copies of TssM are present, named TssM.o in the external pillar and TssM.i in  
240 the internal pillar. The inner and the outer pillar TssM proteins are superimposable with the  
241 exception of a 23° kink located at residue 867 (Fig EV9B). These two TssM subunits interact front-to-  
242 back (Fig EV9C) with an area of 1168 Å<sup>2</sup>, a binding energy of -9.9 kcal/mol, and a ΔG of -5.2 kcal/mol.  
243 Each TssM.i also interacts with two adjacent TssM.i within the inner TssM ring at an angle of 76°,  
244 with an area of 1529 Å<sup>2</sup>, a binding energy of -12 kcal/mol and a ΔG of -5.32 kcal/mol (Figs EV6A and  
245 EV9D). Finally, TssM.o<sup>+1</sup> also interacts with TssM.i and the two are oriented at 68° from one another  
246 (Figs EV6A and EV9E).

247 A poorly-defined density that sits in the core region between TssM.i and TssM.o<sup>+1</sup>, was  
248 attributed to the C-terminus of TssM. We built a small loop that terminates into a helix. (Fig EV9F).  
249 This region is disordered in the outer pillar monomer (TssM.o). Additionally, the resolution of the  
250 pillars gets worse towards the basal side, and no secondary structure could be identified when we  
251 tried to build *de novo* the atomic model of TssM. Despite this high degree of flexibility, we produced  
252 a model of the periplasmic region between amino acids 390 and 550 based on a RaptorX contact  
253 predictions. This model fits well (correlations of 0.819 and 0.827) into the remaining densities (Fig  
254 EV9G). The EM density shows that while they are separated at the level of the arches, the inner and  
255 the outer pillar re-join at the level of the inner membrane (Fig EV9G).

### 256 *The periplasmic TssM gate*

257 The inner pillars of TssM form a channel with a diameter that varies between 2.6 Å and > 20 Å  
258 (Fig 5B-C). The site of constriction observed in the cryo-EM density (Figs 3B,E) corresponds to loop  
259 776-786 in the atomic model of TssM (Fig 5D). Specifically, residues Gln-779 and Asn-780-781  
260 maintain the constriction via polar interactions (Fig 5D). In the external pillar, the same loop interacts  
261 with loop 600-625 on the neighbouring pillar, providing further stabilisation of the structure (Fig  
262 EV10A). Conservation analysis of the sequence with related proteins predicted by the ConSurf server  
263 (Celniker *et al*, 2013), indicated that the sequence of the loop 776-786 is poorly conserved amongst  
264 species (Fig EV10B) although the presence of a loop at this position is a conserved feature. As  
265 previously proposed (Durand *et al*, 2015), these data suggest that the purified TssJLM MC is in a  
266 closed state. Large conformational changes, including modification of the constriction and movement  
267 of the inner pillars are therefore required to allow the passage of the tube/spike during sheath  
268 contraction.

269



## 270 *The TssM periplasmic gate is required for MC assembly and T6SS function*

271 To test the function of the periplasmic gate, several mutations were engineered at the *tssM*  
272 locus in the wild-type EAEC 17-2 strain and the function of the T6SS was assessed as previously  
273 described (Fig 5E-G). To covalently stabilize the contacts between the internal pillars and thus  
274 prevent MC opening, Gln779 and Asn780 were substituted with cysteines (Q779C-N780C).  
275 Conversely, a constitutively open gate was created by deleting a large portion of the constriction  
276 loop ( $\Delta$ 777-783). Antibacterial competition assays showed that the Q779C-N780C variant loses the  
277 ability to outcompete competitor cells, whereas the single control mutant Q779C did not (Figure 5E).  
278 Deletion of the  $\Delta$ 777-783 loop also impaired the T6SS antibacterial activity (Figure 5E). Fluorescence  
279 microscopy recordings further show that  $_{sfGFP}TssM$  Q779C-N780C and  $_{sfGFP}TssM$   $\Delta$ 777-783 do not  
280 assemble TssM foci since, in contrast to the parental strain, diffuse fluorescent pattern were  
281 observed (Figs 5F and EV11). These results demonstrate that the MC is not properly assembled when  
282 the integrity of the periplasmic gate is impacted. As expected, these mutant cells were not able to  
283 assemble T6SS sheaths (Figs 5G and EV11).

## 284 *Discussion*

285 In this study, we report the *in situ* and *in vitro* structures of the T6SS TssJLM MC from EAEC.  
286 The cryo-ET structure confirmed the 5-fold symmetry and general architecture *in vivo* while the high-  
287 resolution cryo-EM structure provided molecular details about the periplasmic portion of the  
288 complex (Fig 1, Fig 3 and Movie 3). As previously defined, the pentameric propeller-like structure  
289 composed of 10 pillars intertwined with each other was observed both *in situ* and from purified  
290 material (Figs 1 and 3C-E). Cryo-ET analyses allowed to position both the inner and outer  
291 membranes. As anticipated based on biochemical experiments showing that TssJ is a periplasmic  
292 lipoprotein attached to the outer membrane by an acyl anchor (Aschtgen *et al*, 2008), the tip of the  
293 complex is embedded in the outer membrane (Fig 2B). However, neither the predicted detergent cap  
294 in the SPA cryo-EM structure nor the cryo-ET data, indicate that TssJLM breaches or crosses the outer  
295 membrane (Fig 2, Fig 3A-B). Nevertheless, it has been shown that this region is extracellularly  
296 exposed in wild-type EAEC cells (Durand *et al*, 2015). Although the cryo-EM structure demonstrates  
297 that the C-terminal region of TssM locates in the periplasm, we propose that the recruitment of  
298 specific T6SS components induces MC conformational changes and cell surface exposition of the  
299 TssM C-terminus. While our previous study suggested that the inner membrane locates at the level  
300 of the arches (Durand *et al*, 2015), the cryo-ET analyses revealed that the inner membrane surrounds  
301 the base (Fig 2B). Moreover, some tomograms also revealed the most basal parts of the MC, which  
302 cross the inner membrane into the cytoplasm (Fig 2A, C). The *in situ* cryo-ET structure presents an  
303 apparent elongation of the tip region compared to the cryo-EM structure (Fig EV12A, B and Movie 3),

304 which could correspond to an additional density associated to the outer membrane or which could  
305 alternatively be explained by the missing wedge. Nevertheless, the similarities between both  
306 structures allowed the atomic model of TssJ - TssM to be docked into the *in situ* average (Fig EV12C,  
307 D), whereas the cryo-EM structure could be placed in a cellular context (Fig EV12E and Movie 3).

308 The base of the complex in this higher resolution structure was not better resolved than in the  
309 negative stain structure (Figs 3A, F, and EV3D). This base should comprise 10 copies of the TssM and  
310 TssL cytoplasmic domains (Durand *et al*, 2015). TssL forms dimers (Zoued *et al*, 2018; Durand *et al*,  
311 2012; Zoued *et al*, 2016) and the crystal structure of its cytoplasmic hook-like domain has been  
312 reported from various species including EAEC, *P. aeruginosa* and *V. cholerae* (Durand *et al*, 2012;  
313 Robb *et al*, 2012; Chang & Kim, 2015; Wang *et al*, 2018)(Durand *et al*, 2012; Robb *et al*, 2012; Chang  
314 & Kim, 2015). The TssM cytoplasmic domain is comprised between the N-terminal transmembrane  
315 hairpin and a third transmembrane helix (Ma *et al*, 2009; Logger *et al*, 2016). No high-resolution  
316 structure of the TssM cytoplasmic domain is available, although a model has been built based on  
317 homology with DPY-30 and NTPases (Logger *et al*, 2016). Unfortunately, due to the poor resolution of  
318 the base, we did not succeed to confidently fit the TssL and TssM cytoplasmic domains in this  
319 density. Additional assays to improve the resolution such as the use of nanodiscs or amphipols  
320 proved to be unsuccessful (Fig EV13A). The flexibility of the TssJLM base, which did not allow for it to  
321 be resolved, might be due to the absence of other T6SS cytoplasmic components such as the  
322 baseplate. A similar observation was made for the type III secretion system, in which the presence of  
323 the cytoplasmic sorting platform orders the IM components (Hu *et al*, 2017). One may hypothesize  
324 that this flexibility is essential for the docking of the hexameric baseplate, and to accommodate the  
325 five-fold to six-fold symmetry mismatch. One alternative hypothesis is that the disorder at the centre  
326 of the base structure is caused by the presence of a lipid bilayer encircled by the TssM and TssL  
327 proteins. In the *in vivo* situation, the MC assembles first, before the recruitment of the baseplate  
328 (Durand *et al*, 2015; Brunet *et al*, 2015), and hence, one can expect that a lipid bilayer at the  
329 entrance of the TssJLM lumen would be present before baseplate docking to prevent the leakage of  
330 solutes and proton-motive force.

331 The high-resolution structure of the EAEC TssJLM MC also revealed new interesting and  
332 functional features. First, five additional TssJ subunits, called TssJ', were identified in the tip complex.  
333 These TssJ' proteins interact with the TssJ proteins of the outer pillars (TssJ.i). Mutations that  
334 interfere with TssJ'-TssJ.i interaction impair the functional integrity of the MC and hence inactivated  
335 the T6SS (Fig 4D-F). Second, we identified a 11-amino-acid loop in TssM that protrudes from each  
336 inner pillar to the centre of the channel, thus creating a constriction that is observed in the density  
337 map (Fig 3D, E). Each loop is stabilized by the adjacent loop via Asn/Gln pairings. Such weak  
338 interactions could be easily displaced by the VgrG/PAAR spike upon baseplate docking or during

339 firing. Our mutational analyses demonstrate that this constriction is important for TssJLM MC  
340 formation and T6SS activity. Periplasmic constrictions are usual features of trans-envelope  
341 complexes. The best characterized examples include the OM T2SS and T3SS secretins, and the CsgG  
342 curli secretion channel who present one or two periplasmic gates to prevent leakage (Fig EV14A-B)  
343 (Yan *et al*, 2017; Spagnuolo *et al*, 2010; Goyal *et al*, 2014). While we do not know the role of this  
344 constriction in the T6SS, we propose that these loops may stabilize the MC in its closed conformation  
345 during the resting state. The cryo-EM structure defined two hinge regions that exhibit a certain  
346 degree of flexibility (Fig EV9B,G). These two hinges result in the formation of the two layers of pillars,  
347 with the inner layer obstructing the channel. A large conformational change of these pillars is  
348 therefore necessary to open the channel for the passage of the tube/spike complex. Interestingly,  
349 with an interaction surface of 1540 Å<sup>2</sup> ( $\Delta G$  of 6.1 kcal/mol) the TssM inner pillars contacts are  
350 considerably less stable than the contacts within the T2SS secretin (interaction surface of 5353.7 Å<sup>2</sup>  
351 and  $\Delta G$  of -52.4 kcal/mol). The displacement of the pillars could be controlled by the flexibility of the  
352 hinge regions.

353 Based on these data, we propose a model in which the T6SS TssJLM MC is assembled in a  
354 closed state. In this conformation, five pillars are oriented toward the centre of the complex to close  
355 the complex at the outer membrane and hence to protect the cell from periplasmic leakage or from  
356 the entry of toxic compounds. This conformation is further stabilized by the interactions of the TssM  
357 protruding loops. The flexibility of the MC cytoplasmic base allows the proper positioning of the  
358 TssKFGE-VgrG baseplate, and accommodates the five-to-six symmetry. The docking of the baseplate  
359 positions the VgrG/PAAR spike in proximity to the inner membrane. Once in contact with the target  
360 cell, a signal transmitted to the baseplate triggers the contraction of the sheath, allowing the passage  
361 of the tube/spike complex through the MC. The hinge regions undergo a tectonic conformational  
362 change that opens the channel and the tip complex. The MC then returns to the resting, closing state  
363 allowing a new cycle to start (Figure 6).

364

### 365 **Acknowledgements**

366 We would like to thank Yoann Santin for advice on fluorescent microscopy data recording,  
367 treatment and analysis, Erney Ramírez-Aportela for help with map sharpening with LocalDeblur and  
368 Marion Decossas-Mendoza for help with grid preparation.

369 This work has benefitted from the facilities and expertise of the Biophysical and Structural  
370 Chemistry platform (BPCS) at IECB, CNRS UMS3033, Inserm US001, Bordeaux University, in particular  
371 we would like to thank Armel Bezault. The authors acknowledge the support and the use of  
372 resources of Instruct-ERIC and Diamond light source for the collect of the amphipoles-containing  
373 sample. ScopeM is acknowledged for instrument access at ETH Zürich.

374           This work was funded by the Centre National de la Recherche Scientifique, the Aix-Marseille  
375 Université, and grants from the Agence Nationale de la Recherche (ANR-14-CE14-0006-02, ANR-17-  
376 CE11-0039-01) and the Fondation pour la Recherche Médicale (DEQ20180339165) to EC. ED was  
377 supported by the INSERM and an EMBO short-term fellowship (ASTF 417 – 2015). YC is supported by  
378 a Doctoral school PhD fellowship from the FRM (ECO20160736014). VS is supported by a post-  
379 doctoral fellowship from the association Espoir contre la Mucoviscidose. LL was supported by a  
380 fourth year PhD fellowship from the FRM (FDT20160435498). MP is funded by the European  
381 Research Council, the Swiss National Science Foundation and the Helmut Horten Foundation. RF and  
382 CR were supported by IDEX Bordeaux through a “chaire d’excellence” to RF.

383  
384 **Declaration of interests**

385  
386 The authors declare no competing interests.  
387

388

389 **Figures legends**

390

391 **Figure 1. Subtomogram average of the TssJLM complex *in situ***

392 **A-E.** Isosurface of the subtomogram average (in pink) with an applied C5 symmetry and 0.69 nm  
393 tomographic slices (A-E) at the indicated heights. The average is shown in side view, whereas the  
394 slices represent perpendicular slices. The 5 pairs of pillars formed a narrow central channel and  
395 separated into 10 arches towards the base (base not visible at the used threshold). The division of  
396 the structure into subparts was adapted from (Durand *et al.*, 2015). Subvolumes were extracted from  
397 cryotomograms of ghost cells and FIB-milled intact *E. coli* BL21 cells heterologously expressing  
398 TssJLM.

399 **A'.** Slice (0.69 nm) through the non-symmetrized average. Note that the C5 symmetry was visible.

400

401 **Figure 2. Position of TssJLM in the cell envelope**

402 **A.** Slice (9.7 nm) through a cryotomogram of a FIB-milled *E. coli* BL21 cell expressing TssJLM. The  
403 average shown in Figure 1 was placed back at the positions and orientations of the individual  
404 subvolumes that were used to generate the final average. The zoomed-in area highlights the position  
405 of the TssJLM particles within the inner and the outer membrane. Some particles were found in  
406 cytoplasmic membrane invaginations, as indicated by white arrows. Scale bar 100 nm.

407 **B.** Isosurface of the final average (orange) merged with the isosurface of a second average (with  
408 higher threshold; grey mesh). The panel shows the positioning of TssJLM with respect to both inner  
409 (IM) and outer membranes (OM). The distances corresponded to the widest and longest dimensions  
410 of the TssJLM complex.

411 **C.** Cryotomographic slices (9.7 nm) showing side views of TssJLM. In these examples, the basal parts  
412 of TssJLM (red arrows) could be seen extending into the cytoplasm. Scale bar 10 nm.

413

414 **Figure 3. 3D structure of the TE complex of the T6SS**

415 **A.** Autosharpened Cryo-EM density of the full TE complex composed of TssJ, TssL and TssM. The  
416 inner pillars are coloured in green and the outer pillars in blue. The unstructured tip and base are in  
417 gray, while the top of the core is in orange.

418 **B.** Vertical cross section of the cryo-EM density. Colouring is according to A. The position of the  
419 slices for C-E are indicated. The density of the base appears to be composed of two leaflets, indicated  
420 by 2 arrows.

421 **C-E.** Cross sections of A, sliced at positions indicated in B.

422 **F.** Subtracted, masked and unsharpened cryo-EM density of the mostly unstructured base

423 **G.** Locally sharpened cryo-EM density of the subtracted and masked core. Three different views are  
424 shown. The colouring is according to A

425

426 **Figure 4. The TssJ' monomer and its function**

427 **A.** Ribbon diagram and locally sharpened surface representation (transparent= of the three TssJ  
428 protomers in orange, labelled TssJ.a, TssJ.A and TssJ' for the internal, external and additional  
429 monomer respectively. In light green and blue are the TssM.a and TssM.A protomers respectively.

430 **B.** Superimposition of the ribbon diagrams of TssM-TssJ heterodimer within the internal (green-  
431 orange) and the external (blue-orange) pillars.

432 **C.** Ribbon diagram of the TssM.A (external pillar) with the TssJ.A and the TssJ' (orange)

433 **D.** Antibacterial assay. Prey cells (Gfp+ kanR E. coli W3110) were mixed with the indicated attacker  
434 cells, spotted onto Sci-1-inducing medium (SIM) agar plates and incubated for 4 h at 37°C. The image  
435 of a representative bacterial competition spot is shown on the upper part. The relative fluorescent  
436 level (in AU) and the number of recovered E. coli recipient cells are indicated in the lower graph (in  
437 log<sub>10</sub> of colony forming units (cfu)). The assays were performed from at least three independent  
438 cultures, with technical triplicates and a representative technical triplicate is shown. The circles  
439 indicate values from technical triplicate, and the average is indicated by the bar. **E.** Fluorescence  
440 microscopy recordings showing sfGFPTssM foci in the parental (WT) and TssJ mutated strains (TssJ  
441 D97K). TssM foci containing cells are indicated by arrowheads. Microscopy analyses were performed  
442 independently three times, each in technical triplicate, and a representative experiment is shown.  
443 Scale bars, 1 µm. **F.** Fluorescence microscopy recordings showing TssBsfGFP sheath in the parental  
444 (WT) and TssJ mutated strains (TssJ D97K). Fluorescent sheath containing cells are indicated by  
445 arrowheads. Microscopy analyses were performed independently three times, each in technical  
446 triplicate, and a representative experiment is shown. Scale bars, 1 µm.

447

448 **Figure 5. The TssM protein and the periplasmic gate**

449 **A.** The high-resolution structure of MC complex in different orientations. TssJ is in orange, TssM is in  
450 green and blue according to their position as an internal or external pillar respectively.

451 **B.** The pore radius formed by the internal pillar of TssM protomers is highlighted as dots and mapped  
452 using HOLE. The atomic model of TssM is coloured according to secondary structure (Helices in pink  
453 and strands in brown)

454 **C.** A graph showing the pore radius calculated along the pore centre of the internal pillar of TssMs.

455 **D.** Ribbon diagram of the region surrounding the periplasmic gate, with the amino acids involved in  
456 the formation of the gate in atom form. Gln779 and Asn780-781 from the internal pillars of TssM  
457 (green) are labelled in one of the protomers

458 **E.** Antibacterial assay. Prey cells (Gfp+ kanR E. coli W3110) were mixed with the indicated attacker  
459 cells, spotted onto Sci-1-inducing medium (SIM) agar plates and incubated for 4 h at 37°C. The image  
460 of a representative bacterial competition spot is shown on the upper part. The relative fluorescent  
461 level (in AU) and the number of recovered E. coli recipient cells are indicated in the lower graph (in  
462 log<sub>10</sub> of colony forming units (cfu)). The assays were performed from at least three independent  
463 cultures, with technical triplicates and a representative technical triplicate is shown. The circles  
464 indicate values from technical triplicate, and the average is indicated by the bar. **F.** Fluorescence  
465 microscopy recordings showing sfGFPTssM foci in the parental (WT) and TssM mutated strains (TssM  
466 Q779C/N780C, TssM Δ777-783). TssM foci containing cells are indicated by arrowheads. Microscopy  
467 analyses were performed independently three times, each in technical triplicate, and a  
468 representative experiment is shown. Scale bars, 1 μm. **G.** Fluorescence microscopy recordings  
469 showing TssBsfGFP sheath in the parental (WT) and TssM mutated strains (TssM Q779C/N780C, TssM  
470 Δ777-783). Fluorescent sheath containing cells are indicated by arrowheads. Microscopy analyses  
471 were performed independently three times, each in technical triplicate, and a representative  
472 experiment is shown. Scale bars, 1 μm.

473

#### 474 **Figure 6. Summary of the Type 6 secretion system cycle of action**

475 The T6SS assembly begins first with the recruitment of the membrane complex (MC) in its resting  
476 state (1). The MC recruits the baseplate (BP) and the tail tip complex (TTC) is assembled (2). The  
477 recently solved structures of the BP (No Title) and MC (this paper) in the membrane context are  
478 shown in the inset. A conformational change leads to the channel opening (3) and release of the  
479 toxin onto the VgrG spike by contraction of the TTC (4). Once the secretion has occurred, the TTC is  
480 recycled (5) and the MC can return to its resting state (6).

481

482

## 483 **Materials and methods**

484

### 485 **Strains and media**

486 Strains used in this study are listed in [Table EV2](#). The *E. coli* K-12 W3110 bearing the pUA66-*rrnB*  
487 vector (Kan<sup>R</sup> and GFP<sup>+</sup>, (Zaslaver *et al*, 2006)) was used as recipient for antibacterial competition  
488 assays. Strains were routinely grown in lysogeny broth (LB) rich medium or in Sci-1-inducing medium  
489 (SIM; M9 minimal medium, glycerol 0.2%, vitamin B1 1 µg.mL<sup>-1</sup>, casaminoacids 100 mg.mL<sup>-1</sup>, LB 10%,  
490 supplemented or not with bactoagar 1.5%) (Brunet *et al*, 2011) with shaking at 37°C.

491

### 492 **Strain construction**

493 *tssM* and *tssJ* point mutations were engineered at the native locus on the chromosome by allelic  
494 replacement using the pKO3 suicide vector (Link *et al*, 1997) into the enteroaggregative *E. coli* 17-2  
495 strain. Briefly, 17-2 WT strain was transformed with a pKO3 plasmid in which a fragment of the *tssM*  
496 or *tssJ* gene carrying the point mutations has been cloned (see below). Insertion of the plasmid into  
497 the chromosome was selected on chloramphenicol plates at 42°C. Plasmid sequences removal was  
498 then selected on 5% sucrose plates without antibiotic and *tssM* point mutation recombinant strains  
499 were screened by PCR and confirmed by DNA sequencing (Eurofins, MWG). Chromosomal fluorescent  
500 reporter insertions into the enteroaggregative *E. coli* 17-2 strain mutated in *tssM* or *tssJ* was  
501 achieved by using a modified one-step inactivation procedure (Datsenko & Wanner, 2000) as  
502 previously described (Aschtgen *et al*, 2008b) using plasmid pKOBEG (Chaverocche *et al*, 2000). Briefly,  
503 a kanamycin cassette was amplified from plasmid pKD4 using oligonucleotide pairs carrying 5' 50-  
504 nucleotide extensions homologous to regions adjacent to the gene to be deleted. After  
505 electroporation of 600 ng of column-purified PCR product, kanamycin-resistant clones were selected  
506 and verified by colony-PCR. The kanamycin cassette, inserted at the gene locus on the bacterial  
507 chromosome, was then excised using plasmid pCP20, leaving an FRT scars. Gene deletions were  
508 confirmed by colony-PCR and sequencing.

509

### 510 **Fluorescence microscopy, image treatment and analyses**

511 Fluorescence microscopy experiments were performed as described (Brunet *et al*, 2013; Zoued *et al*,  
512 2013). Briefly, cells were grown overnight in LB medium and diluted to  $A_{600nm} \sim 0.04$  in SIM.  
513 Exponentially growing cells ( $A_{600nm} \sim 0.8-1$ ) were harvested, washed in phosphate-buffered saline  
514 buffer (PBS), resuspended in PBS to  $A_{600nm} \sim 50$ , spotted on a 1.5% agarose pad and covered with a  
515 cover slip. Fluorescence micrographs were captured using AxioImager M2 microscope (Zeiss)  
516 equipped with an OrcaR2 digital camera (Hamamatsu). For time lapse fluorescence microscopy,  
517 images were recorded with a Nikon Eclipse Ti microscope equipped with an Orcaflash 4.0 LT digital



518 camera (Hamamatsu) and a perfect focus system (PFS) to automatically maintain focus so that the  
519 point of interest within a specimen is always kept in sharp focus at all times despite mechanical or  
520 thermal perturbations. Fluorescence images were acquired with a minimal exposure time to reduce  
521 bleaching and phototoxicity effects, typically 200 ms for TssB-sfGFP and 300 ms for sfGFP-TssM. For  
522 image treatment, noise and background were reduced using the 'Subtract Background' (20 pixels  
523 Rolling Ball) and Band plugins of imageJ (Rasband, 2012). The sfGFP foci were automatically detected  
524 using the microbeJ plugin (Ducret *et al*, 2016). Floating bars representing the number of detected  
525 foci for each strain were made using GraphPad (<https://www.graphpad.com>). Microscopy analyses  
526 were performed at least three times, each in technical triplicate, and a representative experiment is  
527 shown.

528

### 529 **Interbacterial competition assay**

530 The antibacterial growth competition assay was performed as previously described (Flaugnatti *et al*,  
531 2016b). Wild-type *E. coli* K-12 strain W3110 bearing the pUA66-*rrnB* plasmid (conferring kanamycin  
532 resistance and constitutive GFP fluorescence (*gfp* gene under the control of the ribosomal *rrnB*  
533 promoter, (Gueguen & Cascales, 2013) was used as recipient. Attacker and recipient cells were  
534 grown for 16 h in LB medium, diluted in SIM to allow maximal expression of the *sci-1* gene cluster  
535 (Brunet *et al*, 2011). Once the culture reached  $A_{600nm} \sim 0.8$ , cells were harvested and normalized to  
536  $A_{600nm} = 0.5$  in SIM. Attacker and recipient cells were mixed to a 4:1 ratio and 15- $\mu$ l drops of the  
537 mixture were spotted in triplicate onto a pre-warmed dry SIM agar plate. After incubation for 4 h at  
538 37°C, the bacterial spots were resuspended in LB and bacterial suspensions were normalized to  
539  $A_{600nm} = 0.5$ . For the enumeration of viable prey cells, bacterial suspensions were serially diluted and  
540 spotted onto kanamycin LB plates. The assays were performed from at least three independent  
541 cultures, with technical triplicates and a representative technical triplicate is shown.

542

### 543 **Protein preparation:**

544 The expression and purification of the TssJLM complex was carried out as previously described  
545 (Durand *et al*, 2015), with the exception that the cryo-EM grids were prepared immediately after the  
546 HisTrap Elution. For the amphipole-containing sample, the Strep-Trap elution was incubated with  
547 amphipoles A8-35 (Anatrace, USA) and subjected to gel filtration on a superpose 6 (GE Healthcare,  
548 UK) to remove residual detergent.

549

### 550 **Cryo-EM grids preparation and data acquisition**

551 C-flat™ (CF-2/1-2C) grids were coated with graphene oxide as previously described (Martin *et al*,  
552 2016). 3.5  $\mu$ l of the sample at 0.2 mg.mL<sup>-1</sup>, was loaded on the copper side and then blotted on the

553 same side for 2s in a Leica EM GP at 80% humidity and 4 °C, before being plunge frozen in liquid  
554 ethane (-184°C). Micrographs (Fig EV3B) at a nominal magnification of 120,000 X were collected in a  
555 Talos Arctica electron microscope equipped with a Falcon 3EC camera (Thermo Fisher, Waltham, MA,  
556 USA) in linear mode and with a pixel size of 1.24 Å. Dose-fractionated movie frames 20/micrograph  
557 were acquired for 1 s with a total electron flux of 120 e/Å/s. The defocus range chosen for the  
558 automatic collect was 0.7 to 2 µm, which resulted in an actual range between 0.4 to 5 µm.  
559 For the amphipoles-containing MC collection, 3019 movies composed of 25 frames at a defocus  
560 range between 0.7 and 2µm, were collected at 1.38Å pixel size with a 5s exposure time and 15  
561 e/pix/s exposure rate at the Krios 2 at the Diamond eBIC facility.

562

### 563 **Cryo-EM image processing**

564 The 16,000 movies collected were aligned using MotionCor2, with dose weighting (6 e-/Å<sup>2</sup>/frame)  
565 and with 5X5 patches applied (Zheng *et al*, 2017). gCTF was used to estimate the CTF parameters  
566 (Zhang, 2016) and low quality images were discarded. Relion 2.1 (Scheres, 2012) autopicked 227,527  
567 particles and after several rounds of 2D classification in cryosparc (Punjani *et al*, 2017) and a  
568 heterogeneous *ab initio* reconstruction (2 classes), 37,435 particles were converted using the script  
569 csparc2star.py (Asarnow, 2016) and selected for a final 2D classification in relion 2.1 (Fig EV3C), of  
570 which 36,828 particles were selected. An initial unmasked refinement using the *ab initio* model from  
571 cryosparc, gave us a resolution of 7.6 Å with 5-fold applied symmetry and a soft mask of 450 Å. This  
572 refined structure was used to do a movie refinement with all the frames and a polishing step with  
573 RELION2.1. The final masked refinement of the full structure gave a final resolution of 4.9 Å with a C5  
574 symmetry applied, and 7.9 Å with no symmetry applied (Fig EV3E, I), The disordered tip and base  
575 were subtracted and a masked refinement around the core structure yielded a final resolution of 4.6  
576 Å (Fig EV5B). The base focused refinement was also performed on subtracted particles, without the  
577 tip and the core regions, to a resolution of 17Å (Fig EV4F). The resolution for all densities except the  
578 base, was calculated by masked postprocessing according to the “gold standard” method using 0.143  
579 as the FSC value cut-off, or 0.5 for the low resolution reconstruction (Rosenthal & Henderson, 2003)  
580 and the local resolution of the core was calculated by relion 2.1 (Fig EV5 C).

581 For figures and to build *de novo* pseudoatomic models in Coot (Emsley *et al*, 2010), the cryo-EM  
582 density was initially sharpened using phenix.autosharpen (Terwilliger *et al*, 2018) and later with  
583 LocalDeblur (Ramírez-aportela *et al*, 2018). Fitting of density, correlation calculations, molecular  
584 graphics and analyses were performed on UCSF Chimera (Pettersen *et al*, 2004). For the amphipoles  
585 dataset, 2D classes were calculated from a total of 8637 particles (Fig EV13A).

586

### 587 **Model building.**

588 Model building proceeded by fitting the PDB 4Y7O (Durand *et al*, 2015) into the density 2 times for  
589 each pillar, with the cross correlation being calculated using Chimera (Pettersen *et al*, 2004)(Fig  
590 EV5D). The model was manually built in Coot (Emsley *et al*, 2010) using bulky sidechains and  
591 secondary structure predictions (Kelley *et al*, 2015) as guides. The de novo structure was validated  
592 and the register adjusted using residue contact prediction (Bouvier *et al*, 2018). The map of the co-  
593 evolution contacts was aligned with those of the built PDB using the MapAlign software (Ovchinnikov  
594 *et al*, 2017). Where discrepancies were observed, the register was modified to fit the predicted  
595 contact maps (Fig EV8). The model was then refined using one round of rosetta.refine (Wang *et al*,  
596 2016) and phenix.real\_space\_refine (Afonine *et al*, 2018).

597

### 598 **Validation of the data**

599 The model was validated as in the protocol in Refmac5 (Murshudov *et al*, 2011). The FSC map to  
600 model was calculated with the sharpened map (FSC<sub>sum</sub>). The model was shaken by 0.5 Å and the FSC  
601 map to model was calculated with one Half map (FSC<sub>work</sub>). This refined model was then used to  
602 calculate the FSC map to model with the other Half map (FSC<sub>free</sub>) (Fig EV15A).

603 The cross correlation between each amino acid in the model and map was also calculated with  
604 phenix.real\_space\_refine (Afonine *et al*, 2018) (Fig EV15B) and the Molprobrity score (Chen *et al*,  
605 2010). was obtained from the online server (Table EV5) Pore radius calculations were carried out  
606 using the HOLE (Smart *et al*, 1996) plugin in Coot and the protein interfaces were analysed with PISA  
607 (Krissinel & Henrick, 2007).

608

### 609 **Strains, media and chemicals**

610 The strains, plasmids and nucleotides used in this study are listed in Tables EV2 and 3. For the cryoET  
611 studies, *E. coli* K-12 BL21(DE3) and enteroaggregative *E. coli* EAEC strain 17-2 were used for protein  
612 overexpression before plunge freezing. Strains were routinely grown in LB-Miller or in Sci-1-inducing  
613 medium (SIM; M9 minimal medium, glycerol 0.2%, vitamin B1 1 mg ml<sup>-1</sup>, casaminoacids 100 mg ml<sup>-1</sup>,  
614 LB 10%, supplemented or not with bactoagar 1.5%) (Brunet *et al*, 2011) with shaking at 37°C.  
615 Plasmids were maintained by the addition of ampicillin (100 mg ml<sup>-1</sup> for *E. coli* K-12, 200 mg ml<sup>-1</sup> for  
616 EAEC), kanamycin (50 mg ml<sup>-1</sup>) or chloramphenicol (30 mg ml<sup>-1</sup>). Expression of genes from pRSF (in  
617 BL21) and pBAD33 (in EAEC) vectors was induced for 2-3h with 1 mM of isopropyl-b-D-thio-  
618 galactopyrannoside (IPTG) or 0.3% L-arabinose, respectively.

619

### 620 **Preparation of frozen-hydrated specimens**

621 Plunge freezing was performed according to (Weiss *et al*, 2017). *E. coli* BL21 or EAEC cells were  
622 concentrated by centrifugation to an OD<sub>600</sub> of 3 - 20 and then mixed with protein A – 10 nm gold

623 conjugate (Cytodiagnostics Inc.). The higher concentrations of cells were used when preparing grids  
624 for cryo-focused ion beam (cryo-FIB) milling to form “bacterial lawns” of several layers of bacteria on  
625 top of each other. Bacterial lawns were found to be more amenable to cryo-FIB milling than  
626 individual cells. A 3  $\mu$ L droplet of the sample was applied to a carbon-coated EM copper grid (R2/1,  
627 Quantifoil) that had been previously glow-discharged for 90 s at -25 mA using a Pelco easiGlow™  
628 (Ted Pella, Inc.). The grid was plunge-frozen in liquid ethane-propane (37 %/63 %) using a Mark IV  
629 Vitrobot (Thermo Fisher Scientific). The forceps were mounted in the Vitrobot (27°C, humidity 95%)  
630 and the grid was blotted from both sides or only from the backside by installing a Teflon sheet  
631 (instead of a filter paper) on the front blotting pad. Grids were stored in liquid nitrogen.

632

### 633 **Cryo-focused ion beam milling**

634 Cryo-focused ion beam (cryo-FIB) milling was used to prepare samples of plunge-frozen cells that  
635 could then be imaged by electron cryotomography (Marko *et al*, 2007). Our cryo-FIB milling workflow  
636 has been detailed in (Medeiros *et al*, 2018b). Frozen grids with lawns of *E. coli* BL21 cells  
637 overexpressing TssJLM were clipped into modified Autogrids provided by J. Plitzko or a commercial  
638 prototype provided by Thermo Fisher. We then transferred the grids into the liquid nitrogen bath of  
639 a loading station (Leica Microsystems) and clamped them onto a “40° pre-tilted TEM grid holder”  
640 (Leica Microsystems). The holder with grids was shuttled from the loading station to the dual beam  
641 instrument using the VCT100 transfer system (Leica Microsystems). The holder was mounted on a  
642 custom-built cryo-stage in a Helios NanoLab600i dual beam FIB/SEM instrument (FEI). The stage  
643 temperature was maintained below -154°C during loading, milling and unloading procedures. Grid  
644 quality was checked by scanning EM (SEM) imaging (5 kV, 21 pA). The samples were then coated with  
645 a Platinum (Pt) precursor gas using the Gas Injector System. We adapted a “cold deposition”  
646 technique that was published previously (Hayles *et al*, 2007) (needle distance to target of 8 mm,  
647 temperature of the precursor gas of 27 °C, and open valve time of 5 s). Lamellae were milled in  
648 several steps. We first targeted two rectangular regions to generate a lamella with  $\sim$ 2  $\mu$ m thickness  
649 with the ion beam set to 30 kV and  $\sim$ 400 pA. The current of the ion beam was then gradually reduced  
650 until the lamella reached a nominal thickness of 150-400 nm (ion beam set to  $\sim$ 25 pA). Up to 6  
651 lamellae were milled per grid. After documentation of the lamellae by SEM imaging, the holder was  
652 brought back to the loading station using the VCT100 transfer system. The grids were unloaded and  
653 stored in liquid nitrogen.

654

### 655 **Electron cryomicroscopy and electron cryotomography**

656 *E. coli* BL21 and EAEC cells (overexpressing TssJLM where indicated), cryo-FIB-processed *E. coli* BL21  
657 cells overexpressing TssJLM, and purified TssJLM samples were examined by electron

658 cryotomography (cryoET). Images were recorded on a Tecnai Polara TEM (Thermo Fisher Scientific)  
659 equipped with post-column GIF 2002 imaging filter and K2 Summit direct electron detector (Gatan),  
660 or on a Titan Krios TEM (Thermo Fisher Scientific) equipped with a Quantum LS imaging filter and K2  
661 Summit (Gatan). Both microscopes were operated at 300kV and the imaging filters with a 20 eV slit  
662 width. The pixel size at the specimen level ranged from 4.93 Å to 4.05 Å. The latter pixel-sized was  
663 used for the sub-tomogram average. Tilt series covered an angular range from -60° to +60° with 2°  
664 (lamellae, sheath preparations) increments and -10 to -6 µm defocus, or in focus (0 µm defocus)  
665 when the data was collected on the Titan Krios with a Volta phase plate (Thermo Fisher Scientific)  
666 (Danev & Baumeister, 2016). The total dose of a tilt series was 60-100 e<sup>-</sup>/Å<sup>2</sup>. Tilt series and 2D  
667 projection images were acquired automatically using UCSF Tomo (Zheng *et al*, 2007) on the Tecnai  
668 Polara and SerialEM (Mastronarde, 2005) on the Titan Krios. Three-dimensional reconstructions and  
669 segmentations were generated using the IMOD program suite (Kremer *et al*, 2005).

670

### 671 **Sub-tomogram averaging**

672 Tomograms used for subtomogram averaging were not CTF-corrected, as most of the particles  
673 were extracted from tomograms collected in focus with the Volta phase plate. Individual particles  
674 were identified visually in tomograms as 5-branched stars shapes in top and bottom views and as  
675 inverted-Y shapes in side views and their longitudinal axes were manually modelled with open  
676 contours in 3dmod (Kremer *et al*, 1996). The manual particle picking and first round of sub-  
677 tomogram averaging were performed with the PEET software package on tomograms that were  
678 binned by 4 (1k reconstructions). Model points, the initial motive list, and the particle rotation axes  
679 were generated using the stalknit program from the PEET package (Nicastro *et al*, 2006). This  
680 approach allowed the definition of each structure's longitudinal axis as the particle y-axis. 28474  
681 individual particles extracted from cryotomograms of *E. coli* BL21 ghost and FIB-milled cells were  
682 averaged using PEET with a box size of 44 pixels in x and z, and 72 pixels in y for the final step on data  
683 binned by 2 (2k reconstruction, final pixel size 8.1 Å). A random particle was chosen as a first  
684 reference. Missing wedge compensation was activated. The final motive lists obtained after this  
685 initial average performed on tomograms that were binned by 4 were then translated and used to  
686 perform a new round of sub-tomogram averaging on tomograms that were binned by 2 (2k  
687 reconstructions). From individual particles and after analysing the resulting average, C<sub>5</sub> symmetry  
688 was imposed. The Fourier shell correlation curves were calculated in PEET to estimate resolution. A  
689 cylindrical mask centred on the structure's longitudinal axis was applied to the volumes using  
690 imodmop (IMOD package) in order to mask neighbouring structures and the membranes during  
691 averaging. 3dmod (IMOD package) and UCSF Chimera (Pettersen *et al*, 2004) were used for

692 visualization of the averages. 3dmod was used for generating all the movies, except for the morph  
693 and the atomic model visualization in Movie 3 that were generated in UCSF Chimera.  
694

695 **References**

- 696 Afonine P V., Poon BK, Read RJ, Sobolev O V., Terwilliger TC, Urzhumtsev A & Adams PD (2018) Real-  
697 space refinement in PHENIX for cryo-EM and crystallography. *Acta Crystallogr. Sect. D Struct.*  
698 *Biol.* **74**: 531–544 Available at: <http://www.ncbi.nlm.nih.gov/pubmed/29872004>
- 699 Asarnow D (2016) pyem.
- 700 Aschtgen M-S, Bernard CS, De Bentzmann S, Lloubes R & Cascales E (2008a) SciN Is an Outer  
701 Membrane Lipoprotein Required for Type VI Secretion in Enteroaggregative Escherichia coli. *J.*  
702 *Bacteriol.* **190**: 7523–7531
- 703 Aschtgen M-S, Bernard CS, De Bentzmann S, Lloubes R & Cascales E (2008b) SciN Is an Outer  
704 Membrane Lipoprotein Required for Type VI Secretion in Enteroaggregative Escherichia coli. *J.*  
705 *Bacteriol.* **190**: 7523–7531 Available at: <http://jb.asm.org/cgi/doi/10.1128/JB.00945-08>
- 706 Aschtgen MS, Zoued A, Lloubès R, Journet L & Cascales E (2012) The C-tail anchored TssL subunit, an  
707 essential protein of the enteroaggregative Escherichia coli Sci-1 Type VI secretion system, is  
708 inserted by YidC. *Microbiologyopen*
- 709 Barker JR, Chong A, Wehrly TD, Yu JJ, Rodriguez SA, Liu J, Celli J, Arulanandam BP & Klose KE (2009)  
710 The Francisella tularensis pathogenicity island encodes a secretion system that is required for  
711 phagosome escape and virulence. *Mol. Microbiol.* **74**: 1459–1470
- 712 Basler M, Pilhofer M, Henderson GP, Jensen GJ & Mekalanos JJ (2012) Type VI secretion requires a  
713 dynamic contractile phage tail-like structure. *Nature* **483**: 182–186 Available at:  
714 <http://www.nature.com/articles/nature10846>
- 715 Bouvier G, Bardiaux B & Nilges M (2018) Automatic Building of Protein Atomic Models from Cryo-EM  
716 Maps. *Biophys. J.* **114**: 190a–191a Available at:  
717 <http://linkinghub.elsevier.com/retrieve/pii/S000634951732297X>
- 718 Boyer F, Fichant G, Berthod J, Vandenbrouck Y & Attree I (2009) Dissecting the bacterial type VI  
719 secretion system by a genome wide in silico analysis: what can be learned from available  
720 microbial genomic resources? *BMC Genomics* **10**: 104 Available at:  
721 <http://www.pubmedcentral.nih.gov/articlerender.fcgi?artid=2660368&tool=pmcentrez&render>  
722 [type=abstract%5Cnhttp://www.ncbi.nlm.nih.gov/pubmed/19284603%5Cnhttp://www.pubmed](http://www.ncbi.nlm.nih.gov/pubmed/19284603)  
723 [central.nih.gov/articlerender.fcgi?artid=PMC2660368%5Cnhttp://bmcgenomics.biomedcentral](http://www.ncbi.nlm.nih.gov/pubmed/19284603)
- 724 Brunet YR, Bernard CS, Gavioli M, Lloubès R & Cascales E (2011) An Epigenetic Switch Involving  
725 Overlapping Fur and DNA Methylation Optimizes Expression of a Type VI Secretion Gene  
726 Cluster. *PLoS Genet.* **7**: e1002205 Available at:  
727 <http://dx.plos.org/10.1371/journal.pgen.1002205>
- 728 Brunet YR, Espinosa L, Harchouni S, Mignot T & Cascales E (2013) Imaging Type VI Secretion-  
729 Mediated Bacterial Killing. *Cell Rep.* **3**: 36–41 Available at:

- 730 <http://linkinghub.elsevier.com/retrieve/pii/S2211124712004263>
- 731 Brunet YR, Henin J, Celia H & Cascales E (2014) Type VI secretion and bacteriophage tail tubes share a  
732 common assembly pathway. *EMBO Rep.* **15**: 315–321 Available at:  
733 <http://embor.embopress.org/cgi/doi/10.1002/embr.201337936>
- 734 Brunet YR, Zoued A, Boyer F, Douzi B & Cascales E (2015) The Type VI Secretion TssEFGK-VgrG Phage-  
735 Like Baseplate Is Recruited to the TssJLM Membrane Complex via Multiple Contacts and Serves  
736 As Assembly Platform for Tail Tube/Sheath Polymerization. *PLOS Genet.* **11**: e1005545 Available  
737 at: <http://dx.plos.org/10.1371/journal.pgen.1005545>
- 738 Celniker G, Nimrod G, Ashkenazy H, Glaser F, Martz E, Mayrose I, Pupko T & Ben-Tal N (2013)  
739 ConSurf: Using evolutionary data to raise testable hypotheses about protein function. *Isr. J.*  
740 *Chem.*
- 741 Chang JH & Kim Y-G (2015) Crystal structure of the bacterial type VI secretion system component  
742 TssL from *Vibrio cholerae*. *J. Microbiol.*
- 743 Chang Y, Rettberg LA, Ortega DR & Jensen GJ (2017) *In vivo* structures of an intact type VI secretion  
744 system revealed by electron cryotomography. *EMBO Rep.* **18**: 1090–1099 Available at:  
745 <http://embor.embopress.org/lookup/doi/10.15252/embr.201744072>
- 746 Chaverocche MK, Ghigo JM & d'Enfert C (2000) A rapid method for efficient gene replacement in the  
747 filamentous fungus *Aspergillus nidulans*. *Nucleic Acids Res.* **28**: E97 Available at:  
748 [http://www.pubmedcentral.nih.gov/articlerender.fcgi?artid=113889&tool=pmcentrez&rendert](http://www.pubmedcentral.nih.gov/articlerender.fcgi?artid=113889&tool=pmcentrez&rendertype=abstract)  
749 [ype=abstract](http://www.pubmedcentral.nih.gov/articlerender.fcgi?artid=113889&tool=pmcentrez&rendertype=abstract)
- 750 Chen VB, Arendall WB, Headd JJ, Keedy DA, Immormino RM, Kapral GJ, Murray LW, Richardson JS &  
751 Richardson DC (2010) MolProbity: all-atom structure validation for macromolecular  
752 crystallography. *Acta Crystallogr. Sect. D Biol. Crystallogr.* **66**: 12–21 Available at:  
753 <http://scripts.iucr.org/cgi-bin/paper?S0907444909042073>
- 754 Clemens DL, Ge P, Lee B-Y, Horwitz MA & Zhou ZH (2015) Atomic Structure of T6SS Reveals Interlaced  
755 Array Essential to Function. *Cell* **160**: 940–951 Available at:  
756 <http://dx.doi.org/10.1016/j.cell.2015.02.005>
- 757 Danev R & Baumeister W (2016) Cryo-EM single particle analysis with the Volta phase plate. *Elife* **5**:  
758 Available at: <http://www.ncbi.nlm.nih.gov/pubmed/26949259>
- 759 Datsenko KA & Wanner BL (2000) One-step inactivation of chromosomal genes in *Escherichia coli* K-  
760 12 using PCR products. *Proc. Natl. Acad. Sci.* **97**: 6640–6645 Available at:  
761 <http://www.pnas.org/cgi/doi/10.1073/pnas.120163297>
- 762 Ducret A, Quardokus EM & Brun Y V. (2016) MicrobeJ, a tool for high throughput bacterial cell  
763 detection and quantitative analysis. *Nat. Microbiol.* **1**:
- 764 Durand E, Nguyen VS, Zoued A, Logger L, Péhau-Arnaudet G, Aschtgen M-SS, Spinelli S, Desmyter A,



- 765 Bardiaux B, Dujeancourt A, Roussel A, Cambillau C, Cascales E, Fronzes R, Pehau-Arnaudet G,  
766 Aschtgen M-SS, Spinelli S, Desmyter A, Bardiaux B, Dujeancourt A, et al (2015) Biogenesis and  
767 structure of a type VI secretion membrane core complex. *Nature* **523**: 555–560 Available at:  
768 <http://www.ncbi.nlm.nih.gov/pubmed/26200339>
- 769 Durand E, Zoued A, Spinelli S, Watson PJH, Aschtgen M-S, Journet L, Cambillau C & Cascales E (2012)  
770 Structural characterization and oligomerization of the TssL protein, a component shared by  
771 bacterial type VI and type IVb secretion systems. *J. Biol. Chem.* **287**: 14157–68 Available at:  
772 <http://www.ncbi.nlm.nih.gov/pubmed/22371492>
- 773 Emsley P, Lohkamp B, Scott WG & Cowtan K (2010) Features and development of Coot. *Acta*  
774 *Crystallogr. Sect. D Biol. Crystallogr.* **66**: 486–501 Available at:  
775 <http://www.ncbi.nlm.nih.gov/pubmed/20383002>
- 776 Felisberto-Rodrigues C, Durand E, Aschtgen M-S, Blangy S, Ortiz-Lombardia M, Douzi B, Cambillau C &  
777 Cascales E (2011) Towards a structural comprehension of bacterial type VI secretion systems:  
778 characterization of the TssJ-TssM complex of an Escherichia coli pathovar. *PLoS Pathog.* **7**:  
779 e1002386 Available at: <http://www.ncbi.nlm.nih.gov/pubmed/22102820>
- 780 Flaugnatti N, Le TTH, Canaan S, Aschtgen M-S, Nguyen VS, Blangy S, Kellenberger C, Roussel A,  
781 Cambillau C, Cascales E & Journet L (2016a) A phospholipase A 1 antibacterial Type VI secretion  
782 effector interacts directly with the C-terminal domain of the VgrG spike protein for delivery.  
783 *Mol. Microbiol.* **99**: 1099–1118
- 784 Flaugnatti N, Le TTH, Canaan S, Aschtgen M-S, Nguyen VS, Blangy S, Kellenberger C, Roussel A,  
785 Cambillau C, Cascales E & Journet L (2016b) A phospholipase A 1 antibacterial Type VI secretion  
786 effector interacts directly with the C-terminal domain of the VgrG spike protein for delivery.  
787 *Mol. Microbiol.* **99**: 1099–1118 Available at: <http://doi.wiley.com/10.1111/mmi.13292>
- 788 Fu X, Himes BA, Ke D, Rice WJ, Ning J & Zhang P (2014) Controlled bacterial lysis for electron  
789 tomography of native cell membranes. *Structure* **22**: 1875–1882
- 790 Goyal P, Krasteva P V, Van Gerven N, Gubellini F, Van den Broeck I, Troupiotis-Tsaïlaki A, Jonckheere  
791 W, Pehau-Arnaudet G, Pinkner JS, Chapman MR, Hultgren SJ, Howorka S, Fronzes R & Remaut H  
792 (2014) Structural and mechanistic insights into the bacterial amyloid secretion channel CsgG.  
793 *Nature* **516**: 250–3 Available at:  
794 <http://www.pubmedcentral.nih.gov/articlerender.fcgi?artid=4268158&tool=pmcentrez&render>  
795 [type=abstract](http://www.pubmedcentral.nih.gov/articlerender.fcgi?artid=4268158&tool=pmcentrez&render)
- 796 Gueguen E & Cascales E (2013) Promoter Swapping Unveils the Role of the *Citrobacter rodentium*  
797 CTS1 Type VI Secretion System in Interbacterial Competition. *Appl. Environ. Microbiol.* **79**: 32–  
798 38 Available at: <http://aem.asm.org/lookup/doi/10.1128/AEM.02504-12>
- 799 Hayles MF, Stokes DJ, Phifer D & Findlay KC (2007) A technique for improved focused ion beam

- 800 milling of cryo-prepared life science specimens. *J. Microsc.* **226**: 263–9 Available at:  
801 <http://www.ncbi.nlm.nih.gov/pubmed/17535265>
- 802 Hu B, Lara-Tejero M, Kong Q, Galán JE & Liu J (2017) In Situ Molecular Architecture of the Salmonella  
803 Type III Secretion Machine. *Cell* **168**: 1065–1074.e10 Available at:  
804 <http://linkinghub.elsevier.com/retrieve/pii/S0092867417302003>
- 805 Jo S, Kim T & Im W (2007) Automated builder and database of protein/membrane complexes for  
806 molecular dynamics simulations. *PLoS One* **2**:
- 807 Källberg M, Wang H, Wang S, Peng J, Wang Z, Lu H & Xu J (2012) Template-based protein structure  
808 modeling using the RaptorX web server. *Nat. Protoc.* **7**: 1511–1522
- 809 Kelley LA, Mezulis S, Yates CM, Wass MN & Sternberg MJE (2015) The Phyre2 web portal for protein  
810 modeling, prediction and analysis. *Nat. Protoc.* **10**: 845–858
- 811 Kremer JR, Mastronarde DN & McIntosh JR (1996) Computer Visualization of Three-Dimensional  
812 Image Data Using IMOD. *J. Struct. Biol.* **116**: 71–76 Available at:  
813 <http://www.sciencedirect.com/science/article/pii/S1047847796900131%5Cnhttp://www.ncbi.nlm.nih.gov/pubmed/8742726>  
814 <http://www.ncbi.nlm.nih.gov/pubmed/8742726>
- 815 Kremer JR, Mastronarde DN & McIntosh JR (2005) Computer visualization of three-dimensional  
816 image data using IMOD. *J. Struct. Biol.* **116**: 71–6 Available at:  
817 <http://www.ncbi.nlm.nih.gov/pubmed/8742726>
- 818 Krissinel E & Henrick K (2007) Inference of Macromolecular Assemblies from Crystalline State. *J. Mol.*  
819 *Biol.* **372**: 774–797 Available at:  
820 <http://linkinghub.elsevier.com/retrieve/pii/S0022283607006420>
- 821 Kudryashev M, Wang RY-R, Brackmann M, Scherer S, Maier T, Baker D, DiMaio F, Stahlberg H,  
822 Egelman EH & Basler M (2015) Structure of the Type VI Secretion System Contractile Sheath.  
823 *Cell* **160**: 952–962 Available at:  
824 <http://linkinghub.elsevier.com/retrieve/pii/S009286741500080X>
- 825 Link AJ, Phillips D & Church GM (1997) Methods for generating precise deletions and insertions in the  
826 genome of wild-type Escherichia coli: Application to open reading frame characterization. *J.*  
827 *Bacteriol.*
- 828 Logger L, Aschtgen MS, Guérin M, Cascales E & Durand E (2016) Molecular Dissection of the Interface  
829 between the Type VI Secretion TssM Cytoplasmic Domain and the TssG Baseplate Component.  
830 *J. Mol. Biol.* **428**: 4424–4437
- 831 Ma L-S, Lin J-S & Lai E-M (2009) An IcmF Family Protein, ImpLM, Is an Integral Inner Membrane  
832 Protein Interacting with ImpKL, and Its Walker A Motif Is Required for Type VI Secretion System-  
833 Mediated Hcp Secretion in Agrobacterium tumefaciens. *J. Bacteriol.* **191**: 4316–4329 Available  
834 at: <http://jb.asm.org/cgi/doi/10.1128/JB.00029-09>

- 835 Marko M, Hsieh C, Schalek R, Frank J & Mannella C (2007) Focused-ion-beam thinning of frozen-  
836 hydrated biological specimens for cryo-electron microscopy. *Nat. Methods* **4**: 215–7 Available  
837 at: <http://www.ncbi.nlm.nih.gov/pubmed/17277781>
- 838 Martin TG, Boland A, Fitzpatrick AWP & Scheres SHW (2016) Graphene Oxide Grid Preparation.  
839 Available at: [https://figshare.com/articles/Graphene\\_Oxide\\_Grid\\_Preparation/3178669](https://figshare.com/articles/Graphene_Oxide_Grid_Preparation/3178669)
- 840 Mastronarde DN (2005) Automated electron microscope tomography using robust prediction of  
841 specimen movements. *J. Struct. Biol.* **152**: 36–51
- 842 Medeiros JM, Böck D & Pilhofer M (2018a) Imaging bacteria inside their host by cryo-focused ion  
843 beam milling and electron cryotomography. *Curr. Opin. Microbiol.* **43**: 62–68 Available at:  
844 <https://linkinghub.elsevier.com/retrieve/pii/S136952741730200X>
- 845 Medeiros JM, Böck D, Weiss GL, Kooger R, Wepf RA & Pilhofer M (2018b) Robust workflow and  
846 instrumentation for cryo-focused ion beam milling of samples for electron cryotomography.  
847 *Ultramicroscopy* **190**: 1–11 Available at: <http://www.ncbi.nlm.nih.gov/pubmed/29655973>
- 848 Mougous JD, Cuff ME, Raunser S, Shen A, Zhou M, Gifford CA, Goodman AL, Joachimiak G, Ordoñez  
849 CL, Lory S, Walz T, Joachimiak A & Mekalanos JJ (2006) A virulence locus of *Pseudomonas*  
850 *aeruginosa* encodes a protein secretion apparatus. *Science* **312**: 1526–30 Available at:  
851 <http://www.pubmedcentral.nih.gov/articlerender.fcgi?artid=2800167&tool=pmcentrez&render>  
852 [type=abstract](http://www.pubmedcentral.nih.gov/articlerender.fcgi?artid=2800167&tool=pmcentrez&render)
- 853 Murshudov GN, Skubák P, Lebedev AA, Pannu NS, Steiner RA, Nicholls RA, Winn MD, Long F & Vagin  
854 AA (2011) REFMAC 5 for the refinement of macromolecular crystal structures. *Acta Crystallogr.*  
855 *Sect. D Biol. Crystallogr.* **67**: 355–367 Available at: [http://scripts.iucr.org/cgi-](http://scripts.iucr.org/cgi-bin/paper?S0907444911001314)  
856 [bin/paper?S0907444911001314](http://scripts.iucr.org/cgi-bin/paper?S0907444911001314)
- 857 Nazarov S, Schneider JP, Brackmann M, Goldie KN, Stahlberg H & Basler M (2018) Cryo-EM  
858 reconstruction of Type VI secretion system baseplate and sheath distal end. *EMBO J.* **37**:  
859 e97103 Available at: <http://emboj.embopress.org/lookup/doi/10.15252/emboj.201797103>
- 860 Nicastro D, Schwartz C, Pierson J, Gaudette R, Porter ME & McIntosh JR (2006) The molecular  
861 architecture of axonemes revealed by cryoelectron tomography. *Science* **313**: 944–8 Available  
862 at: <http://www.ncbi.nlm.nih.gov/pubmed/16917055>
- 863 No Title
- 864 Ovchinnikov S, Park H, Varghese N, Huang P-S, Pavlopoulos GA, Kim DE, Kamisetty H, Kyripides NC &  
865 Baker D (2017) Protein structure determination using metagenome sequence data. *Science* (80-  
866 ). **355**: 294–298 Available at: <http://www.sciencemag.org/lookup/doi/10.1126/science.aah4043>
- 867 Pettersen EF, Goddard TD, Huang CC, Couch GS, Greenblatt DM, Meng EC & Ferrin TE (2004) UCSF  
868 Chimera--a visualization system for exploratory research and analysis. *J. Comput. Chem.* **25**:  
869 1605–12 Available at: <http://www.cgl.ucsf.edu/chimera/>.

- 870 Punjani A, Rubinstein JL, Fleet DJ & Brubaker MA (2017) cryoSPARC: algorithms for rapid  
871 unsupervised cryo-EM structure determination. *Nat. Methods* **14**: 290–296 Available at:  
872 <http://www.ncbi.nlm.nih.gov/pubmed/28165473>
- 873 Quentin D, Ahmad S, Shanthamoorthy P, Mougous JD, Whitney JC & Raunser S (2018) Mechanism of  
874 loading and translocation of type VI secretion system effector Tse6. *Nat. Microbiol.* Available at:  
875 <http://www.nature.com/articles/s41564-018-0238-z>
- 876 Ramírez-aportela E, Vilas JL, Melero R & Conesa P (2018) Automatic local resolution-based  
877 sharpening of cryo-EM maps. *bioRxiv*: 1–21 Available at:  
878 <https://www.biorxiv.org/content/early/2018/10/02/433284>
- 879 Rao VA, Shepherd SM, English G, Coulthurst SJ & Hunter WN (2011) The structure of *Serratia*  
880 *marcescens* Lip, a membrane-bound component of the type VI secretion system. *Acta*  
881 *Crystallogr. Sect. D Biol. Crystallogr.*
- 882 Rasband W (2012) ImageJ. *U. S. Natl. Institutes Heal. Bethesda, Maryland, USA*: [//imagej.nih.gov/ij/](http://imagej.nih.gov/ij/)
- 883 Renault MG, Zamarreno Beas J, Douzi B, Chabalier M, Zoued A, Brunet YR, Cambillau C, Journet L &  
884 Cascales E (2018) The gp27-like Hub of VgrG Serves as Adaptor to Promote Hcp Tube Assembly.  
885 *J. Mol. Biol.*
- 886 Robb CS, Nano FE & Boraston AB (2012) The structure of the conserved type six secretion protein  
887 TssL (DotU) from *Francisella novicida*. *J. Mol. Biol.*
- 888 Rosenthal PB & Henderson R (2003) Optimal Determination of Particle Orientation, Absolute Hand,  
889 and Contrast Loss in Single-particle Electron Cryomicroscopy. *J. Mol. Biol.* **333**: 721–745  
890 Available at: <http://linkinghub.elsevier.com/retrieve/pii/S0022283603010222>
- 891 Russell AB, Hood RD, Bui NK, LeRoux M, Vollmer W & Mougous JD (2011) Type VI secretion delivers  
892 bacteriolytic effectors to target cells. *Nature* **475**: 343–347 Available at:  
893 <http://dx.doi.org/10.1038/nature10244>
- 894 Russell AB, Peterson SB & Mougous JD (2014) Type VI secretion system effectors: Poisons with a  
895 purpose. *Nat. Rev. Microbiol.* **12**: 137–148
- 896 Scheres SHWW (2012) RELION: Implementation of a Bayesian approach to cryo-EM structure  
897 determination. *J. Struct. Biol.* **180**: 519–530 Available at:  
898 <http://linkinghub.elsevier.com/retrieve/pii/S1047847712002481>
- 899 Shneider MM, Buth SA, Ho BT, Basler M, Mekalanos JJ & Leiman PG (2013) PAAR-repeat proteins  
900 sharpen and diversify the type VI secretion system spike. *Nature* **500**: 350–353 Available at:  
901 [http://www.nature.com/nature/journal/v500/n7462/full/nature12453.html%5Cnhttp://files/6](http://www.nature.com/nature/journal/v500/n7462/full/nature12453.html%5Cnhttp://files/678/Shneider%20et%20al.%20-%202013%20-%20PAAR-repeat%20proteins%20sharpen%20and%20diversify%20the%20typ.pdf%5Cnhttp://files/679/nature12453.html)  
902 [78/Shneider et al. - 2013 - PAAR-repeat proteins sharpen and diversify the](http://www.nature.com/nature/journal/v500/n7462/full/nature12453.html%5Cnhttp://files/678/Shneider%20et%20al.%20-%202013%20-%20PAAR-repeat%20proteins%20sharpen%20and%20diversify%20the%20typ.pdf%5Cnhttp://files/679/nature12453.html)  
903 [typ.pdf%5Cnhttp://files/679/nature12453.html](http://www.nature.com/nature/journal/v500/n7462/full/nature12453.html%5Cnhttp://files/678/Shneider%20et%20al.%20-%202013%20-%20PAAR-repeat%20proteins%20sharpen%20and%20diversify%20the%20typ.pdf%5Cnhttp://files/679/nature12453.html)
- 904 Silverman JM, Agnello DM, Zheng H, Andrews BT, Li M, Catalano CE, Gonen T & Mougous JD (2013)

- 905 Haemolysin Coregulated Protein Is an Exported Receptor and Chaperone of Type VI Secretion  
906 Substrates. *Mol. Cell*
- 907 Smart OS, Neduelil JG, Wang X, Wallace BA & Sansom MSP (1996) HOLE: A program for the analysis  
908 of the pore dimensions of ion channel structural models. *J. Mol. Graph.* **14**: 354–360 Available  
909 at: <http://linkinghub.elsevier.com/retrieve/pii/S026378559700009X>
- 910 Spagnuolo J, Opalka N, Wen WX, Gagic D, Chabaud E, Bellini P, Bennett MD, Norris GE, Darst SA,  
911 Russel M & Rakonjac J (2010) Identification of the gate regions in the primary structure of the  
912 secretin pIV. *Mol. Microbiol.* **76**: 133–150
- 913 Terwilliger TC, Sobolev O, Afonine P V & Adams PD (2018) Automated map sharpening by  
914 maximization of detail and connectivity. *bioRxiv* Available at:  
915 <http://biorxiv.org/content/early/2018/01/11/247049.abstract>
- 916 Unterweger D, Kostiuk B & Pukatzki S (2017) Adaptor Proteins of Type VI Secretion System Effectors.  
917 *Trends Microbiol.* **25**: 8–10 Available at: <http://www.ncbi.nlm.nih.gov/pubmed/27856117>
- 918 Wang RY-R, Song Y, Barad BA, Cheng Y, Fraser JS & DiMaio F (2016) Automated structure refinement  
919 of macromolecular assemblies from cryo-EM maps using Rosetta. *Elife* **5**: Available at:  
920 <https://elifesciences.org/articles/17219>
- 921 Wang X, Sun B, Xu M, Qiu S, Xu D, Ran T, He J & Wang W (2018) Crystal structure of the periplasmic  
922 domain of TssL, a key membrane component of Type VI secretion system. *Int. J. Biol. Macromol.*  
923 **120**: 1474–1479 Available at: <http://www.ncbi.nlm.nih.gov/pubmed/30266644>
- 924 Weiss GL, Medeiros JM & Pilhofer M (2017) In situ imaging of bacterial secretion systems by electron  
925 cryotomography. In *Methods in Molecular Biology* pp 353–375.
- 926 Yan Z, Yin M, Xu D, Zhu Y & Li X (2017) Structural insights into the secretin translocation channel in  
927 the type II secretion system. *Nat. Struct. Mol. Biol.* **24**: 177–183 Available at:  
928 <http://www.ncbi.nlm.nih.gov/pubmed/28067918>
- 929 Zaslaver A, Bren A, Ronen M, Itzkovitz S, Kikoin I, Shavit S, Liebermeister W, Surette MG & Alon U  
930 (2006) A comprehensive library of fluorescent transcriptional reporters for Escherichia coli. *Nat.*  
931 *Methods* **3**: 623–628
- 932 Zhang K (2016) Gctf: Real-time CTF determination and correction. *J. Struct. Biol.* **193**: 1–12 Available  
933 at: <http://linkinghub.elsevier.com/retrieve/pii/S1047847715301003>
- 934 Zhao W, Caro F, Robins W & Mekalanos JJ (2018) Antagonism toward the intestinal microbiota and  
935 its effect on *Vibrio cholerae* virulence. *Science (80-. )*.
- 936 Zheng SQ, Keszthelyi B, Branlund E, Lyle JM, Braunfeld MB, Sedat JW & Agard DA (2007) UCSF  
937 tomography: An integrated software suite for real-time electron microscopic tomographic data  
938 collection, alignment, and reconstruction. *J. Struct. Biol.* **157**: 138–147 Available at:  
939 <http://linkinghub.elsevier.com/retrieve/pii/S1047847706001985>

- 940 Zheng SQ, Palovcak E, Armache J-P, Verba KA, Cheng Y & Agard DA (2017) MotionCor2: anisotropic  
941 correction of beam-induced motion for improved cryo-electron microscopy. *Nat. Methods* **14**:  
942 331–332 Available at: <http://www.nature.com/articles/nmeth.4193>
- 943 Zoued A, Cassaro CJ, Durand E, Douzi B, España AP, Cambillau C, Journet L & Cascales E (2016)  
944 Structure–Function Analysis of the TssL Cytoplasmic Domain Reveals a New Interaction  
945 between the Type VI Secretion Baseplate and Membrane Complexes. *J. Mol. Biol.* **428**: 4413–  
946 4423 Available at: <http://dx.doi.org/10.1016/j.jmb.2016.08.030>
- 947 Zoued A, Duneau JP, Durand E, España AP, Journet L, Guerlesquin F & Cascales E (2018) Tryptophan-  
948 mediated Dimerization of the TssL Transmembrane Anchor Is Required for Type VI Secretion  
949 System Activity. *J. Mol. Biol.*
- 950 Zoued A, Durand E, Bebeacua C, Brunet YR, Douzi B, Cambillau C, Cascales E & Journet L (2013) TssK  
951 is a trimeric cytoplasmic protein interacting with components of both phage-like and  
952 membrane anchoring complexes of the type VI secretion system. *J. Biol. Chem.* **288**: 27031–  
953 27041
- 954

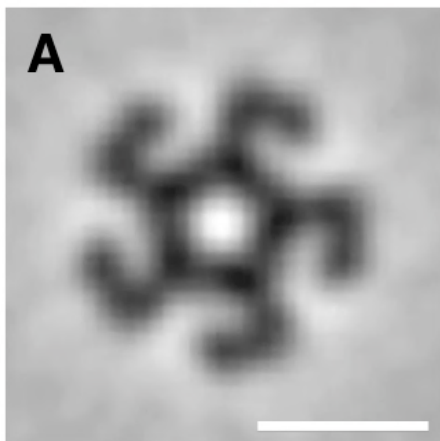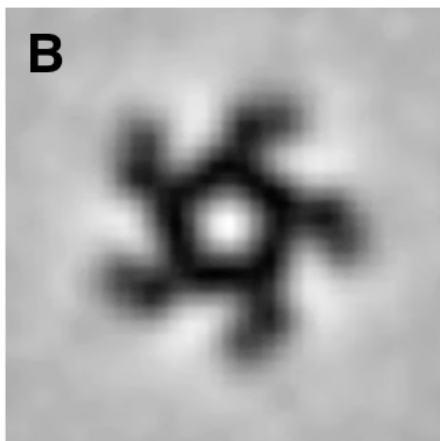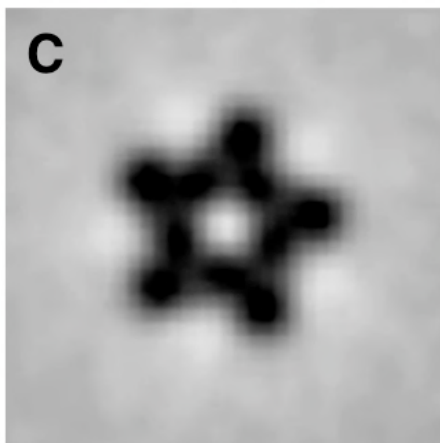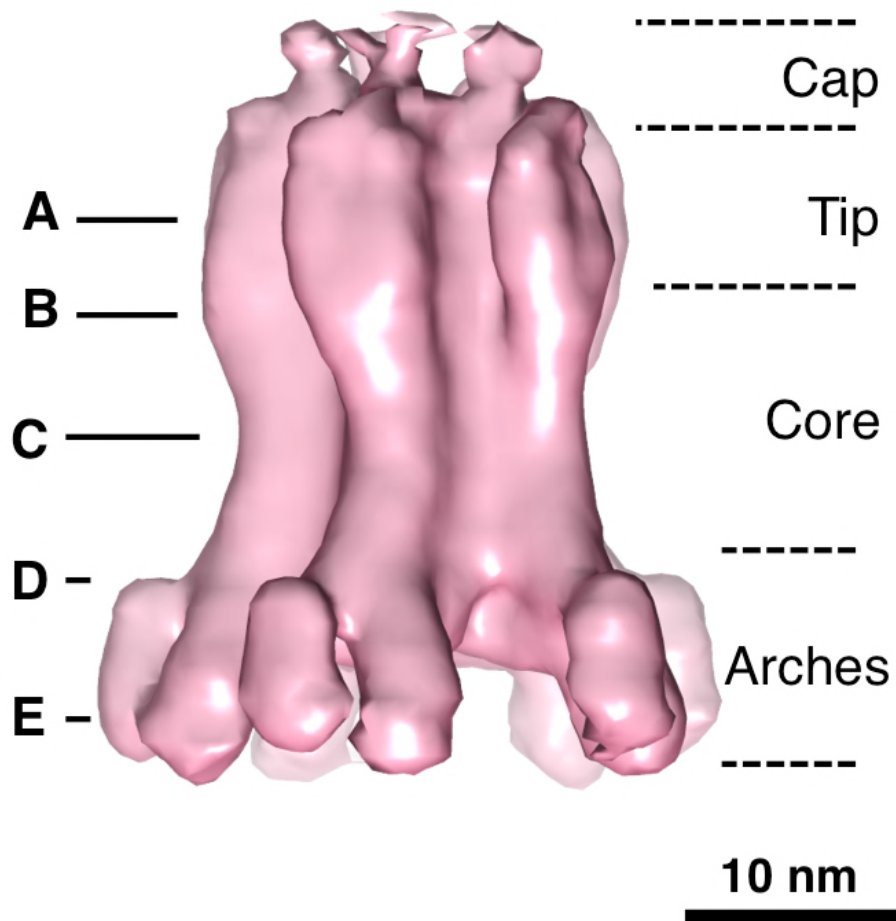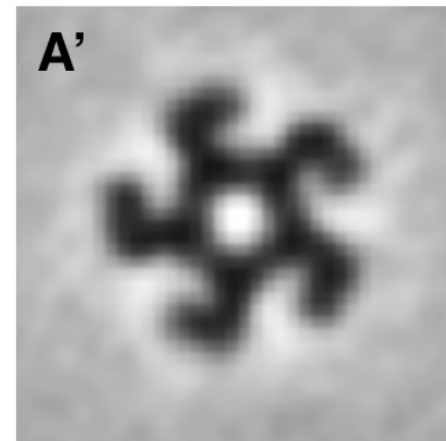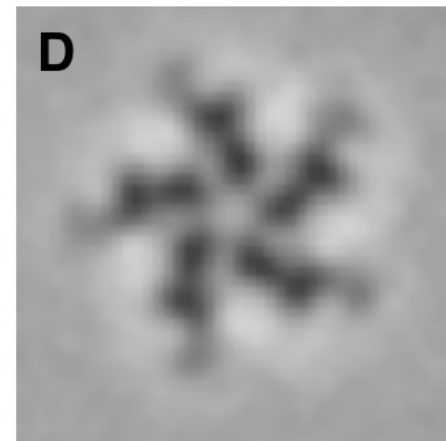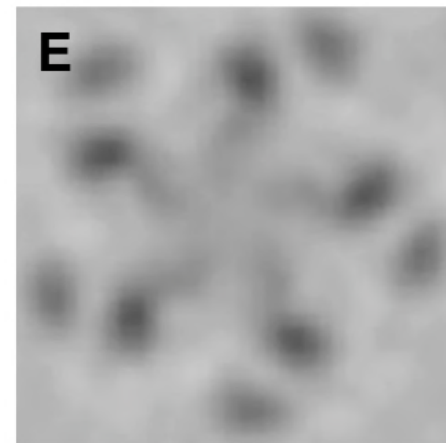

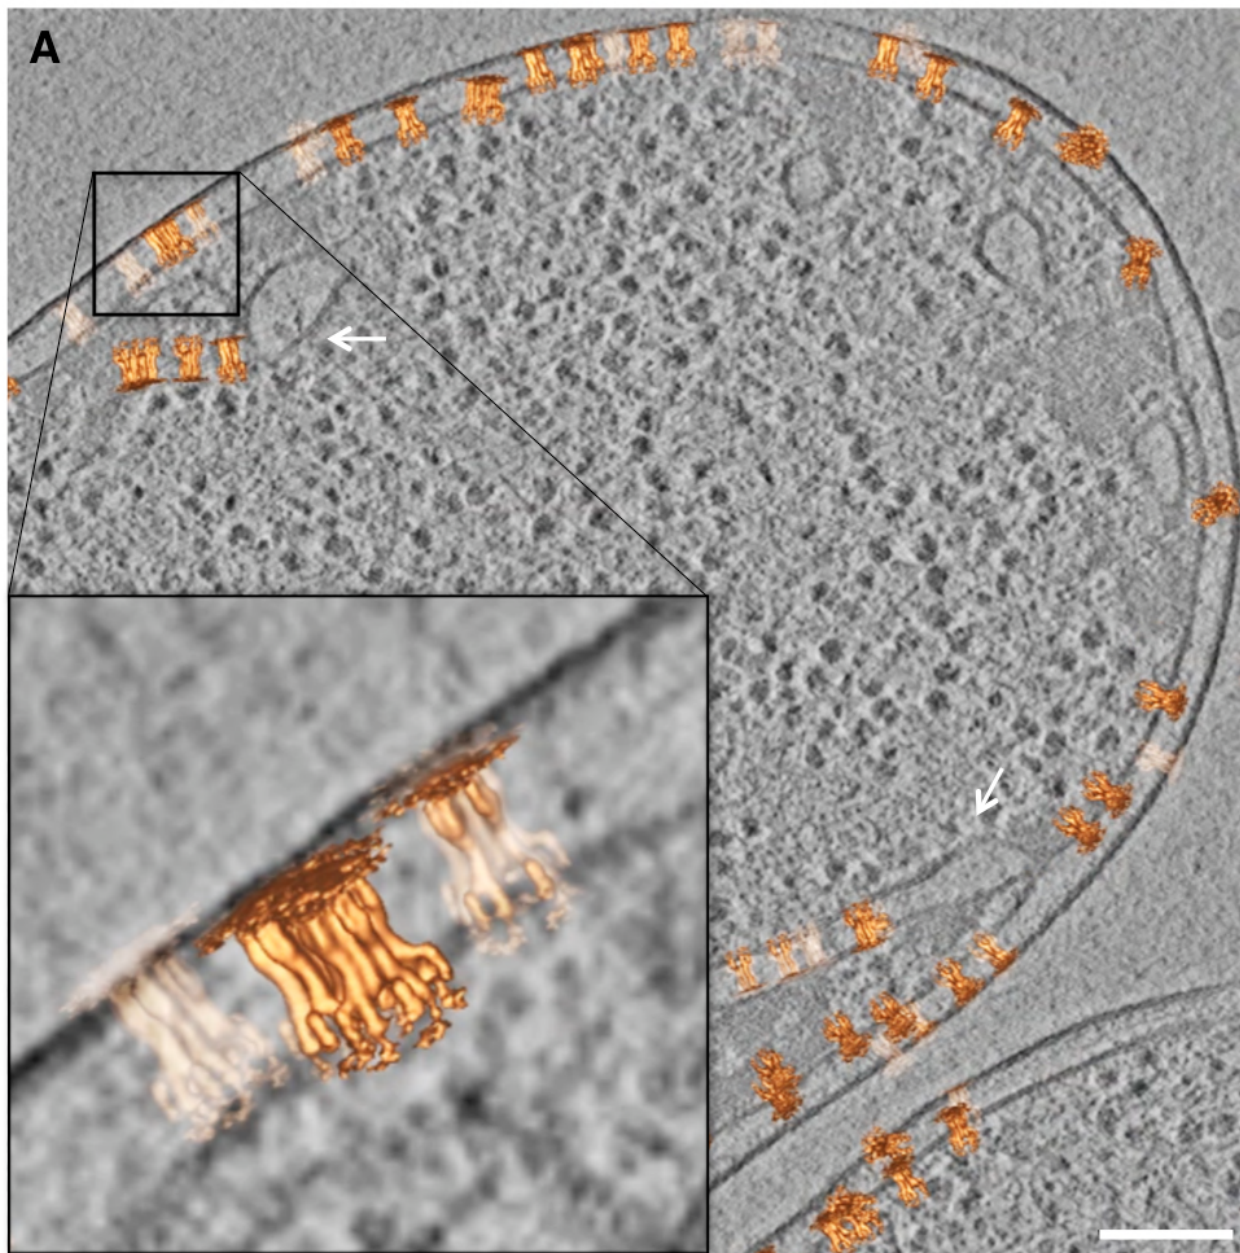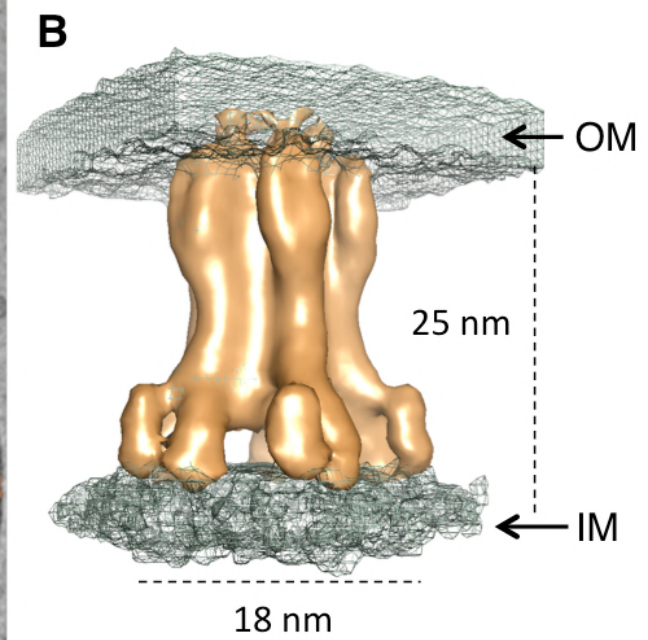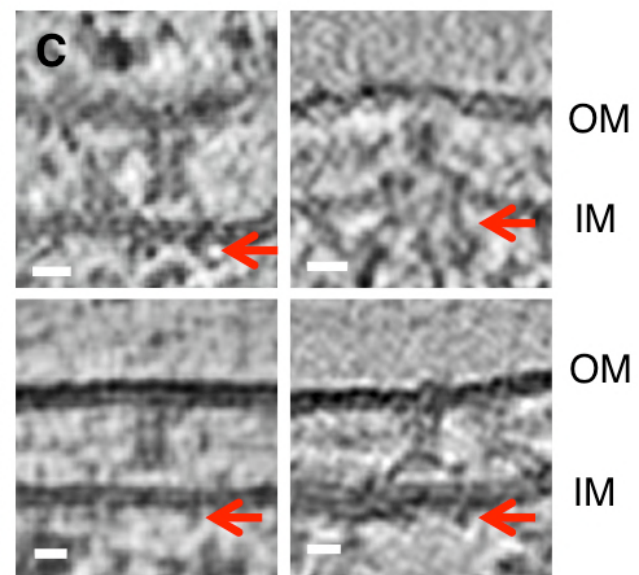



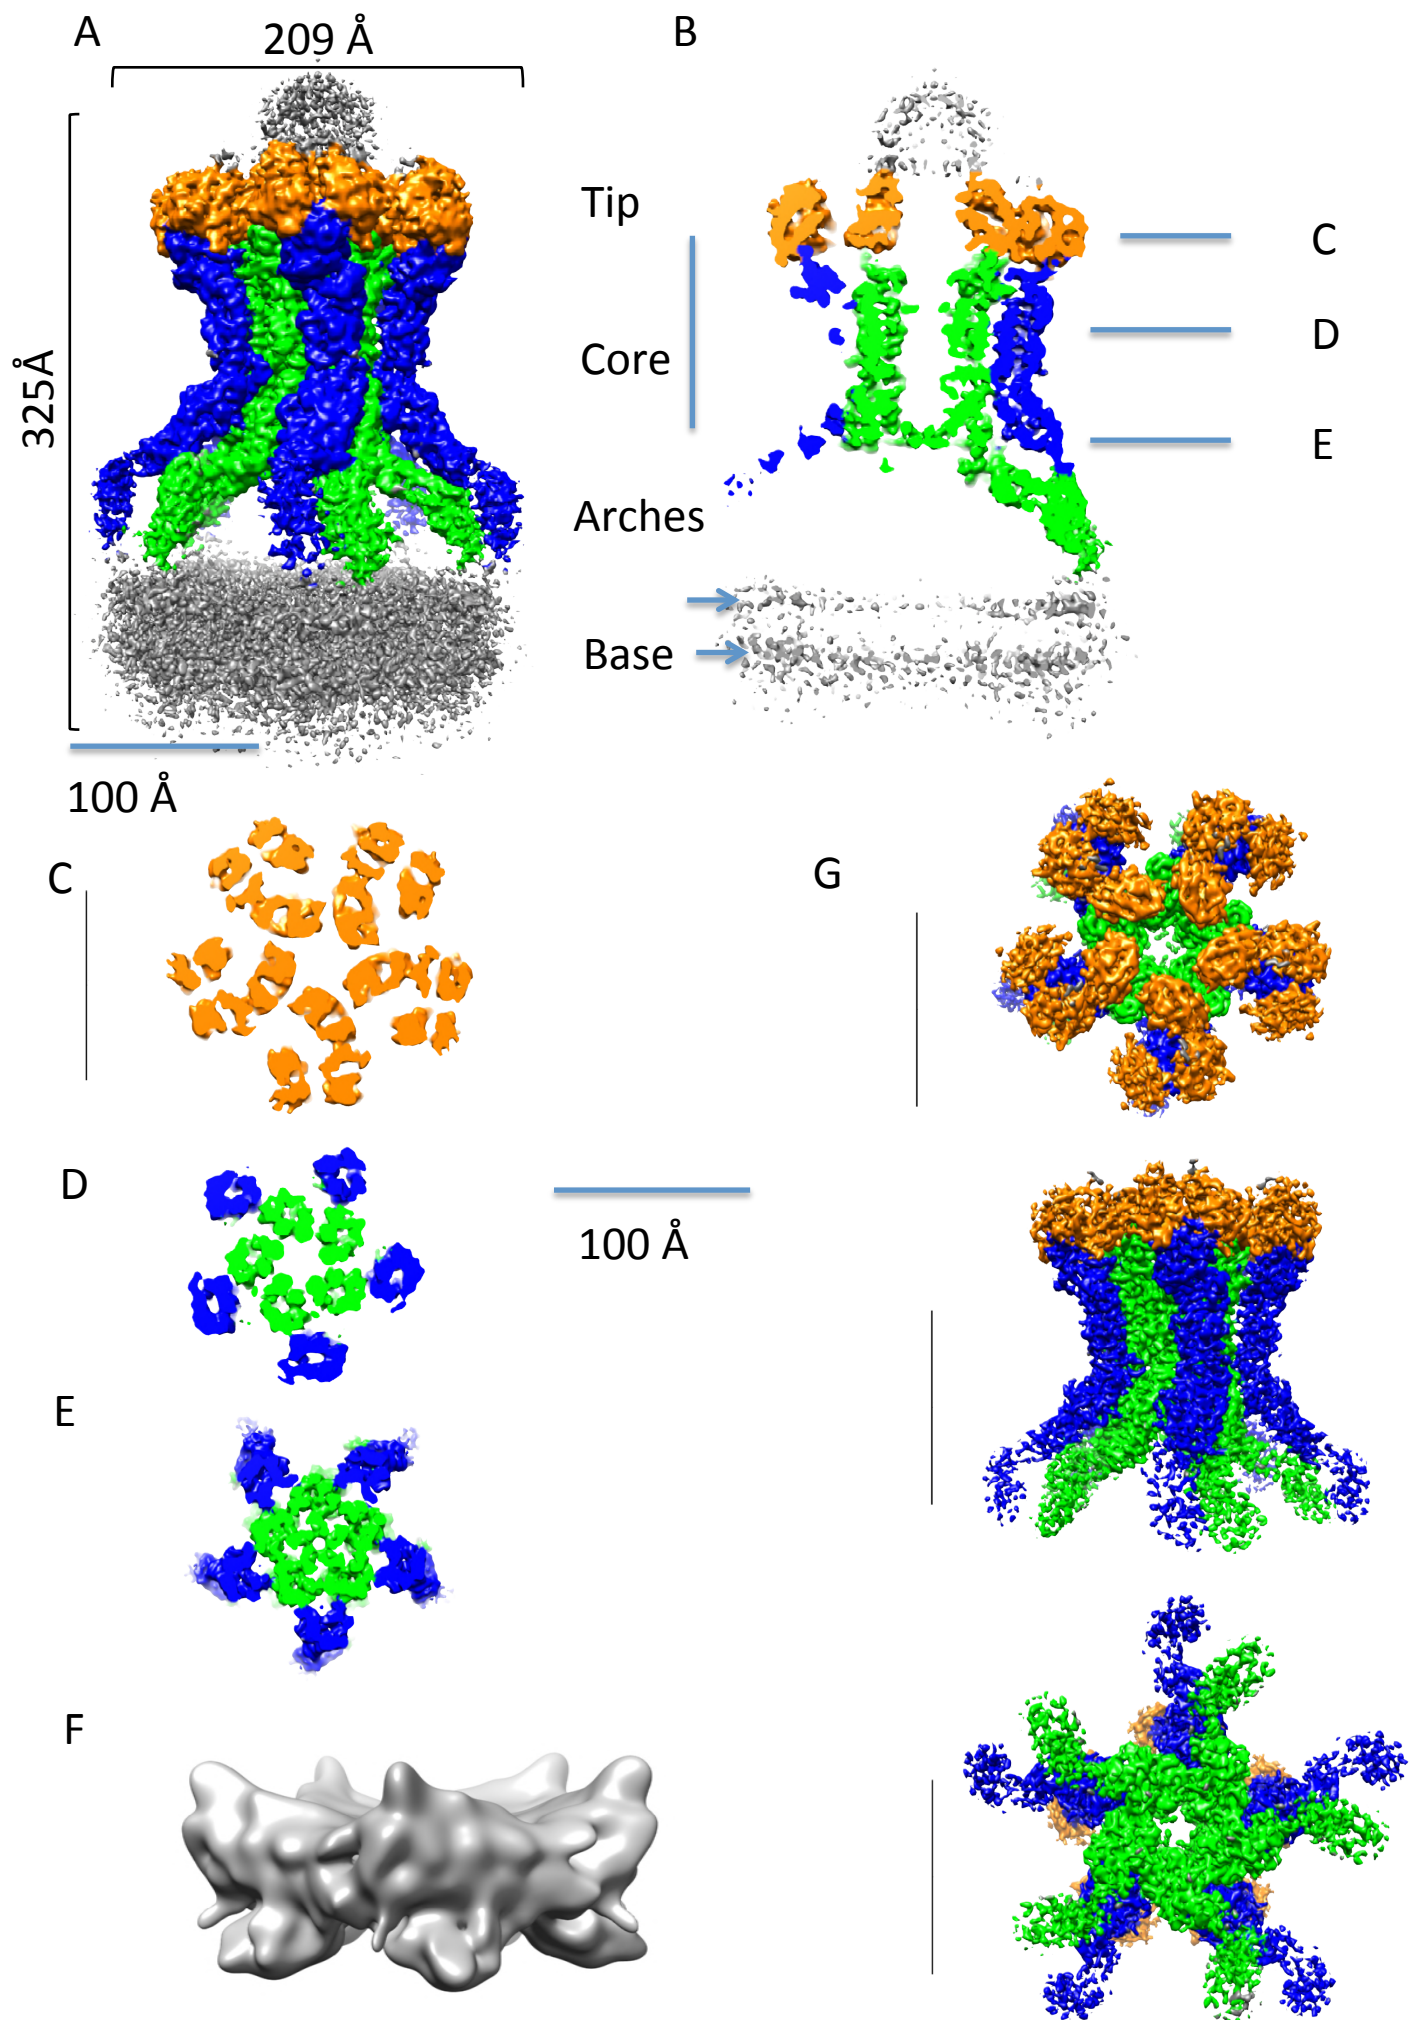

**A**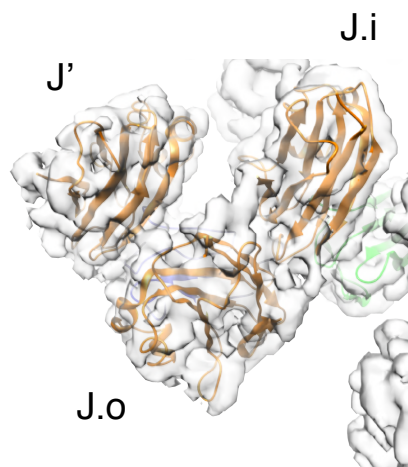**B**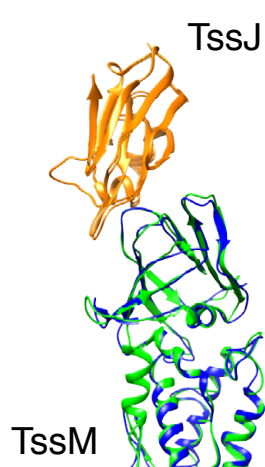**C**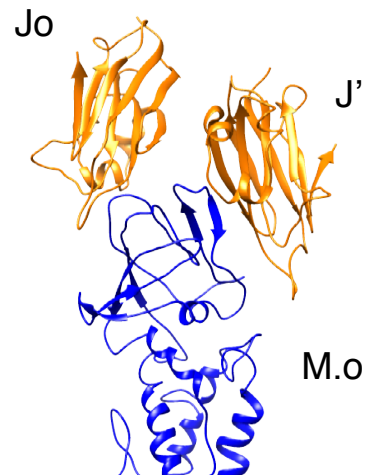**D**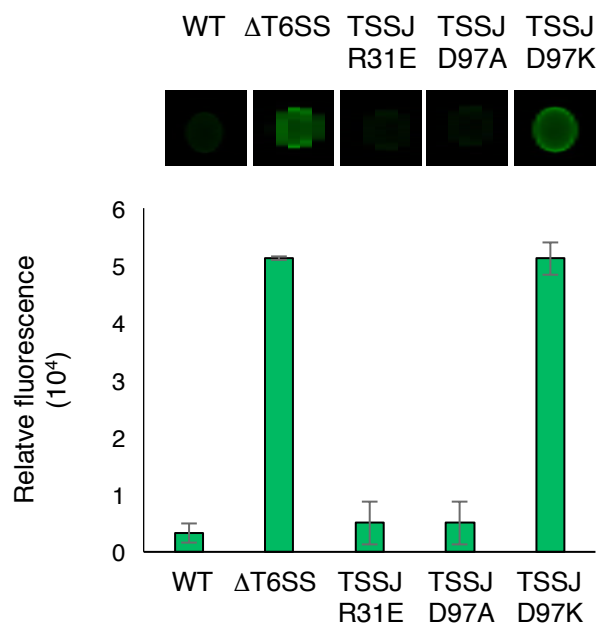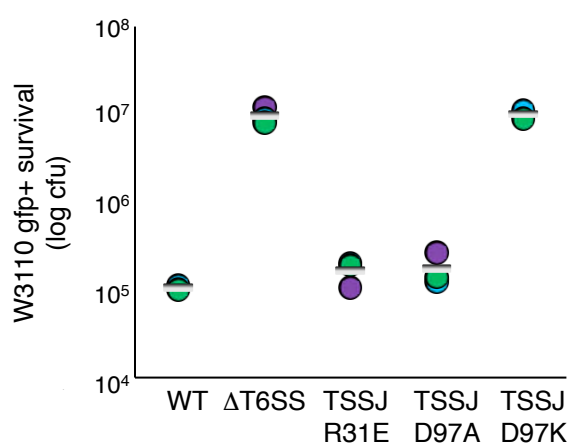**E**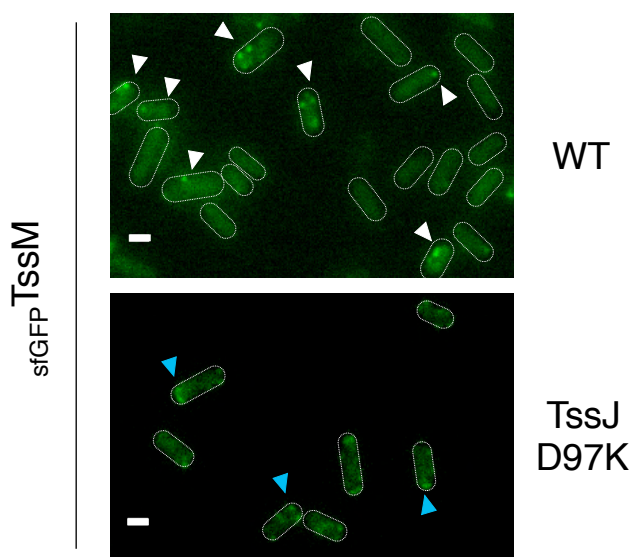**F**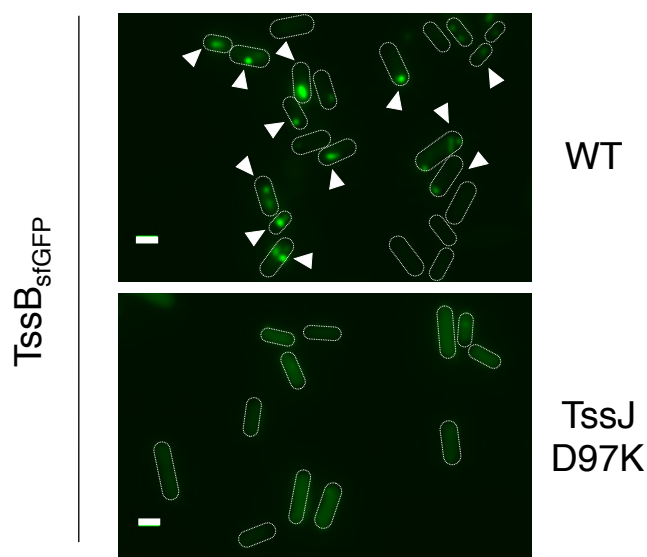

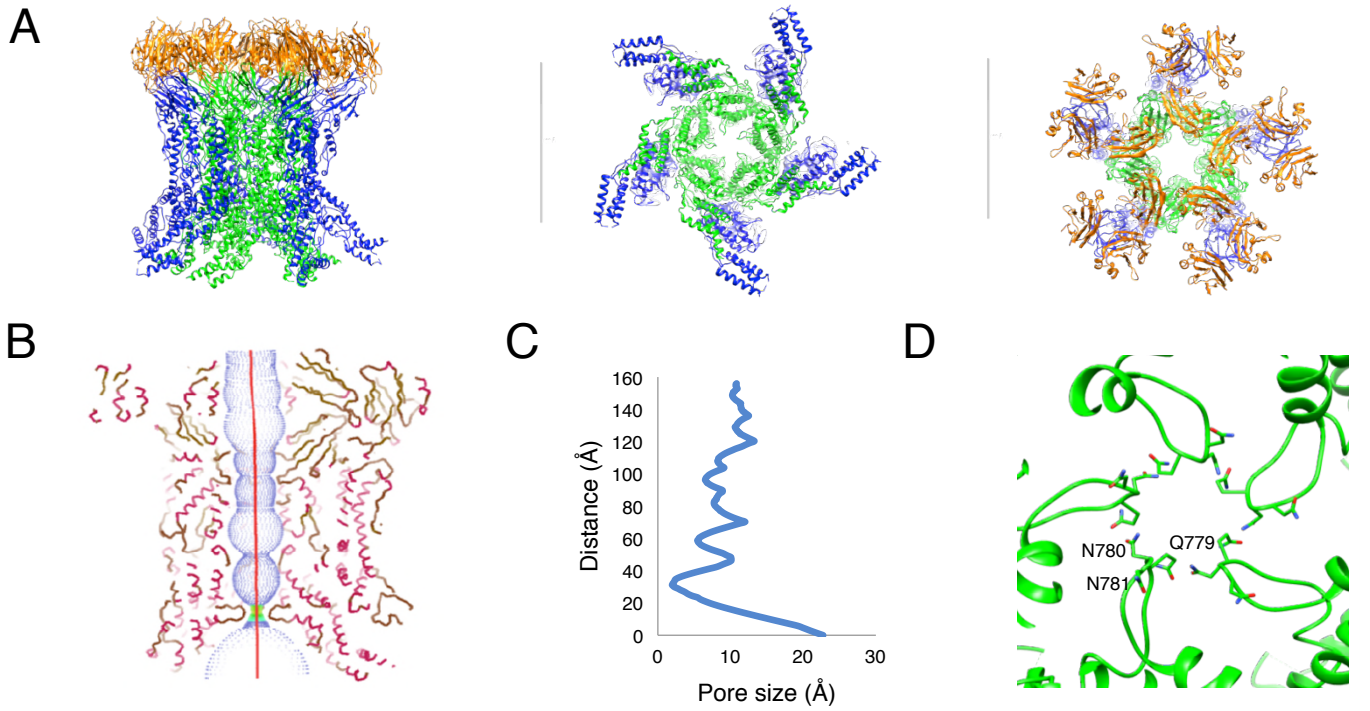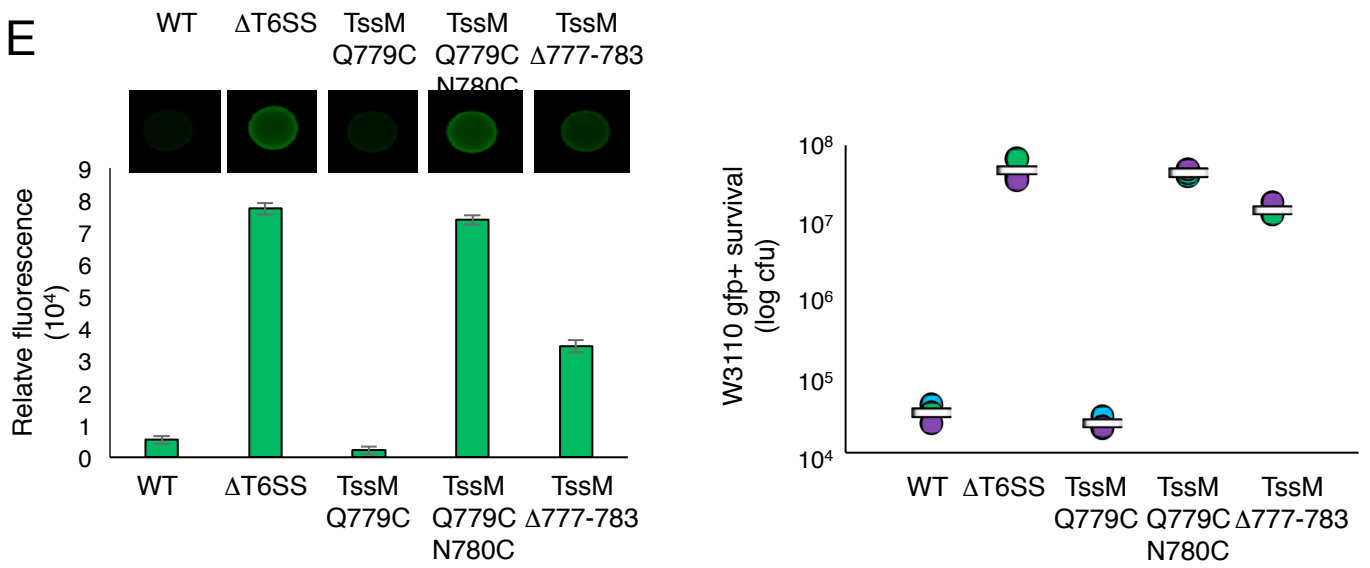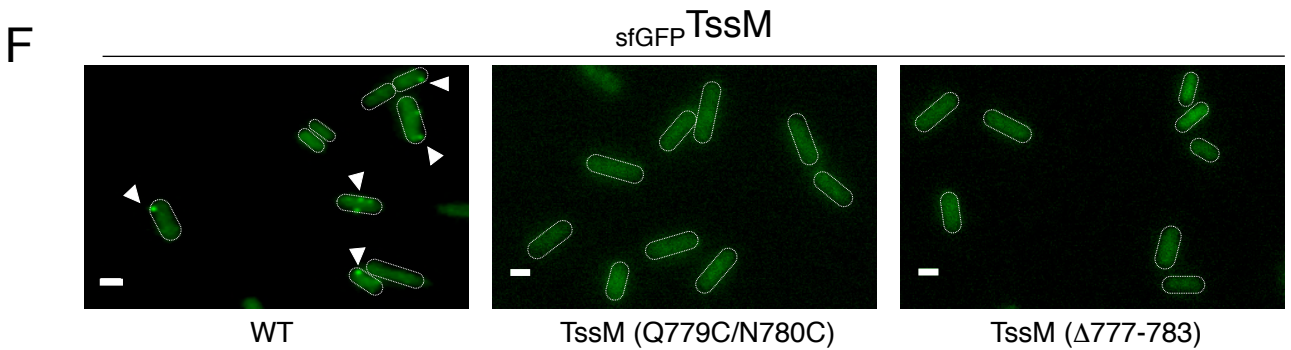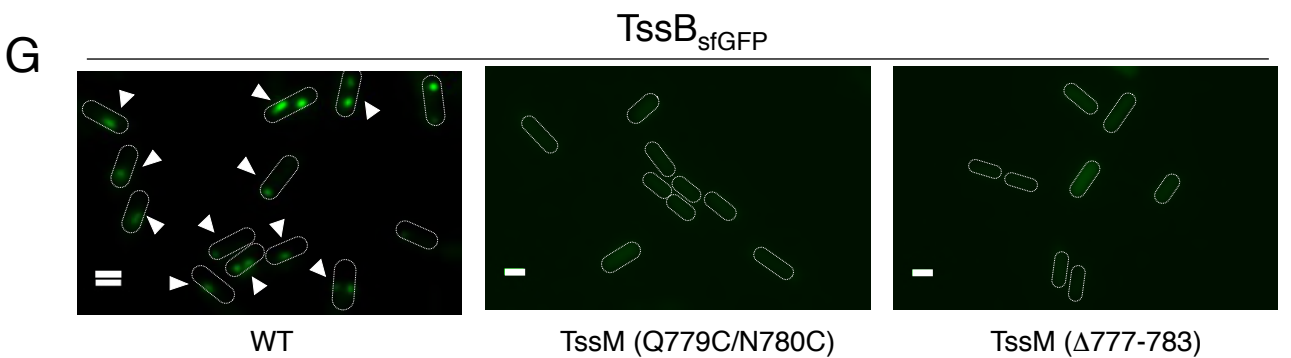

1. MC resting state

2. BP docking & TTC assembly

3. MC conformation dynamic = channel opening

4. OM channel opens, TTC contraction & Hcp-tube and toxin firing

5. TTC recycling & channel closure

6. back to MC resting state

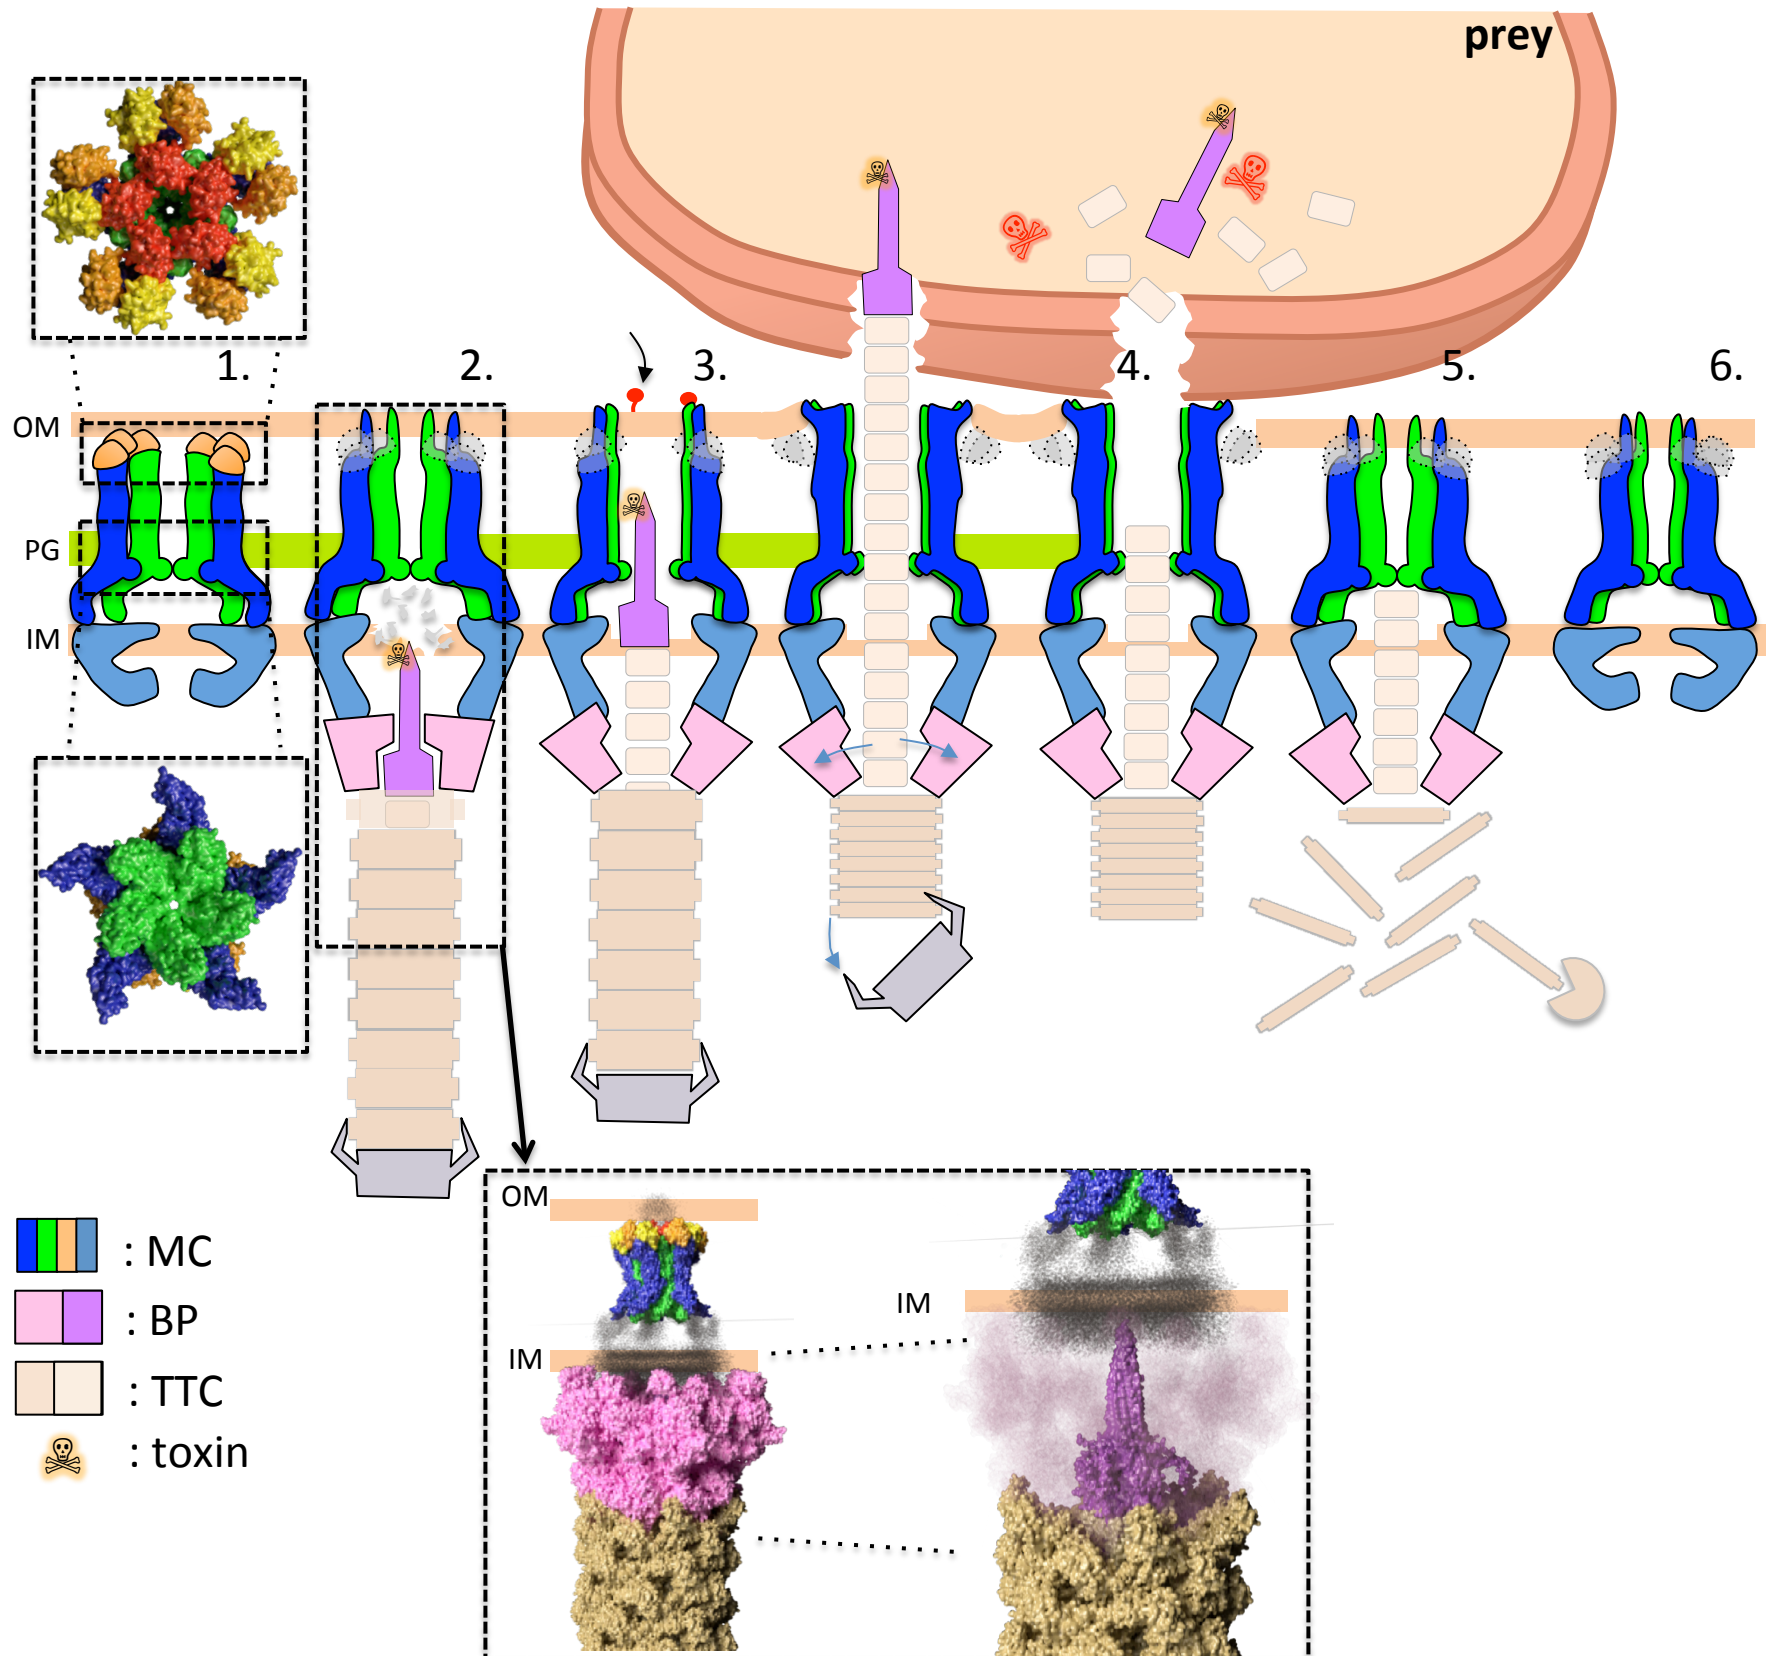

Source: https://biorxiv.org/content/biorxiv/early/2018/10/13/441683.full-text.pdf
